# Supplementary material for: Version 8 IMK/IAA MIPAS temperatures from 12–15 μm spectra: Middle and Upper Atmosphere modes
Source: Copernicus journal article supplement (doi:10.5194/amt-2023-119), 2023-07-06
Supplement: Supplementary file 1 [file amt-2023-119-supplement.pdf]

*Supplement to*

**Version 8 IMK/IAA MIPAS temperatures from 12–15  $\mu\text{m}$  spectra:  
Middle and Upper Atmosphere modes**

**Maya Garcia-Comas et al.**

**Correspondence:** Maya Garcia-Comas (maya@iaa.es)

This supplement contains the temperature error budget collection for MIPAS MA/UA RR data (2005-2012) for daytime ( $SZA < 90^\circ$ ) and nighttime ( $SZA > 95^\circ$ ), estimated using the representative atmospheres listed in Table S0.

**Table S0.** Labels and definitions of the representative atmospheric conditions used to estimate MIPAS temperature errors.

| Atmosphere label            | Months used | Latitude range |
|-----------------------------|-------------|----------------|
| Northern polar winter       | Jan, Feb    | 65°N–90°N      |
| Northern polar spring       | Apr         | 65°N–90°N      |
| Northern polar summer       | Jul, Aug    | 65°N–90°N      |
| Northern polar autumn       | Oct         | 65°N–90°N      |
| Northern midlatitude winter | Jan, Feb    | 40°N–60°N      |
| Northern midlatitude spring | Apr         | 40°N–60°N      |
| Northern midlatitude summer | Jul, Aug    | 40°N–60°N      |
| Northern midlatitude autumn | Oct         | 40°N–60°N      |
| Tropics                     | Apr         | 20°S–20°N      |
| Southern midlatitude winter | Jul, Aug    | 40°S–60°S      |
| Southern midlatitude spring | Oct         | 40°S–60°S      |
| Southern midlatitude summer | Jan, Feb    | 40°S–60°S      |
| Southern midlatitude autumn | Apr         | 40°S–60°S      |
| Southern polar winter       | Jul, Aug    | 65°S–90°S      |
| Southern polar spring       | Oct         | 65°S–90°S      |
| Southern polar summer       | Jan, Feb    | 65°S–90°S      |
| Southern polar autumn       | Apr         | 65°S–90°S      |

**Table S1.** Temperature error budget for Northern polar winter day. All uncertainties are  $1\sigma$ .

| altitude<br>(km) | mean target<br>(K) | NLTE<br>(K) | CO2<br>(K) | ils<br>(K) | gain<br>(K) | spectro<br>(K) | offset<br>(K) | noise<br>(K) | random<br>(K) | syst<br>(K) |
|------------------|--------------------|-------------|------------|------------|-------------|----------------|---------------|--------------|---------------|-------------|
| 20               | 226.0              | <0.1        | <0.1       | 0.1        | 0.5         | 0.4            | <0.1          | 0.3          | 0.5           | 0.5         |
| 30               | 219.6              | <0.1        | <0.1       | 0.4        | 0.4         | 0.3            | <0.1          | 0.3          | 0.4           | 0.6         |
| 40               | 219.2              | <0.1        | <0.1       | 0.1        | 0.4         | 0.2            | 0.1           | 0.3          | 0.4           | 0.5         |
| 50               | 226.8              | <0.1        | <0.1       | 0.4        | 0.4         | 0.2            | 0.1           | 0.5          | 0.6           | 0.6         |
| 60               | 224.0              | <0.1        | <0.1       | 0.4        | 0.3         | 0.6            | 0.2           | 1.0          | 1.1           | 0.7         |
| 70               | 226.6              | 0.7         | 0.3        | 0.3        | 0.2         | 0.7            | 0.7           | 2.5          | 2.6           | 1.1         |
| 80               | 232.1              | 2.9         | <0.1       | 0.3        | 0.4         | 0.7            | 1.2           | 4.4          | 4.8           | 2.7         |
| 90               | 219.7              | 3.3         | 2.0        | 0.6        | 0.4         | 0.5            | 1.3           | 5.3          | 5.7           | 3.6         |
| 100              | 199.7              | 4.6         | 1.0        | 0.7        | 0.8         | 0.4            | 1.6           | 7.3          | 7.8           | 4.3         |
| 110              | 254.2              | 21.4        | 7.7        | 1.9        | 0.9         | 0.5            | 4.8           | 19.3         | 22.9          | 19.8        |
| 115              | 320.4              | 26.7        | 10.9       | 2.7        | 0.9         | 0.7            | 6.7           | 26.9         | 31.0          | 25.5        |

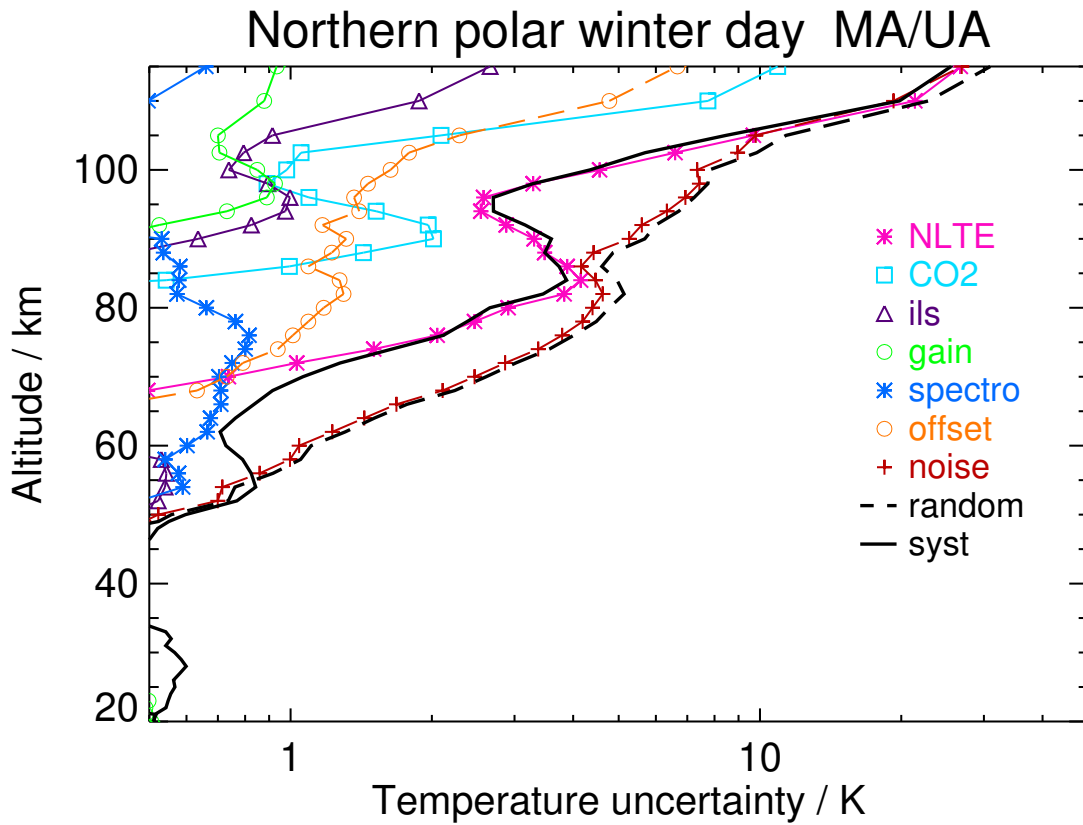**Figure S1.** Temperature uncertainties for Northern polar winter daytime conditions.

**Table S2.** Temperature error budget for Northern polar winter night. All uncertainties are  $1\sigma$ .

| altitude<br>(km) | mean target<br>(K) | NLTE<br>(K) | CO2<br>(K) | ils<br>(K) | gain<br>(K) | spectro<br>(K) | offset<br>(K) | noise<br>(K) | random<br>(K) | syst<br>(K) |
|------------------|--------------------|-------------|------------|------------|-------------|----------------|---------------|--------------|---------------|-------------|
| 20               | 208.1              | <0.1        | <0.1       | 0.2        | 0.4         | 0.4            | <0.1          | 0.3          | 0.4           | 0.6         |
| 30               | 208.7              | <0.1        | <0.1       | 0.4        | 0.4         | 0.6            | <0.1          | 0.3          | 0.6           | 0.6         |
| 40               | 225.3              | <0.1        | <0.1       | 0.1        | 0.4         | 0.5            | 0.1           | 0.4          | 0.6           | 0.6         |
| 50               | 253.9              | <0.1        | <0.1       | 0.5        | 0.4         | 0.3            | 0.1           | 0.5          | 0.6           | 0.6         |
| 60               | 246.3              | 0.2         | <0.1       | 0.3        | 0.3         | 0.8            | 0.2           | 0.9          | 1.0           | 0.9         |
| 70               | 230.2              | 0.7         | 0.3        | 0.3        | 0.2         | 0.9            | 0.8           | 2.3          | 2.5           | 1.2         |
| 80               | 218.4              | 2.1         | <0.1       | 0.5        | 0.3         | 0.7            | 1.1           | 4.4          | 4.8           | 1.7         |
| 90               | 207.3              | 2.8         | 1.8        | 1.0        | 0.5         | 0.3            | 1.4           | 5.5          | 6.0           | 2.9         |
| 100              | 195.7              | 5.8         | 1.2        | 0.9        | 0.9         | 0.3            | 1.8           | 7.6          | 8.3           | 5.3         |
| 110              | 247.2              | 19.1        | 8.5        | 1.6        | 0.7         | 0.5            | 5.6           | 21.7         | 24.4          | 18.6        |
| 115              | 301.0              | 22.7        | 11.0       | 2.2        | 0.8         | 0.6            | 7.1           | 28.3         | 31.5          | 22.5        |

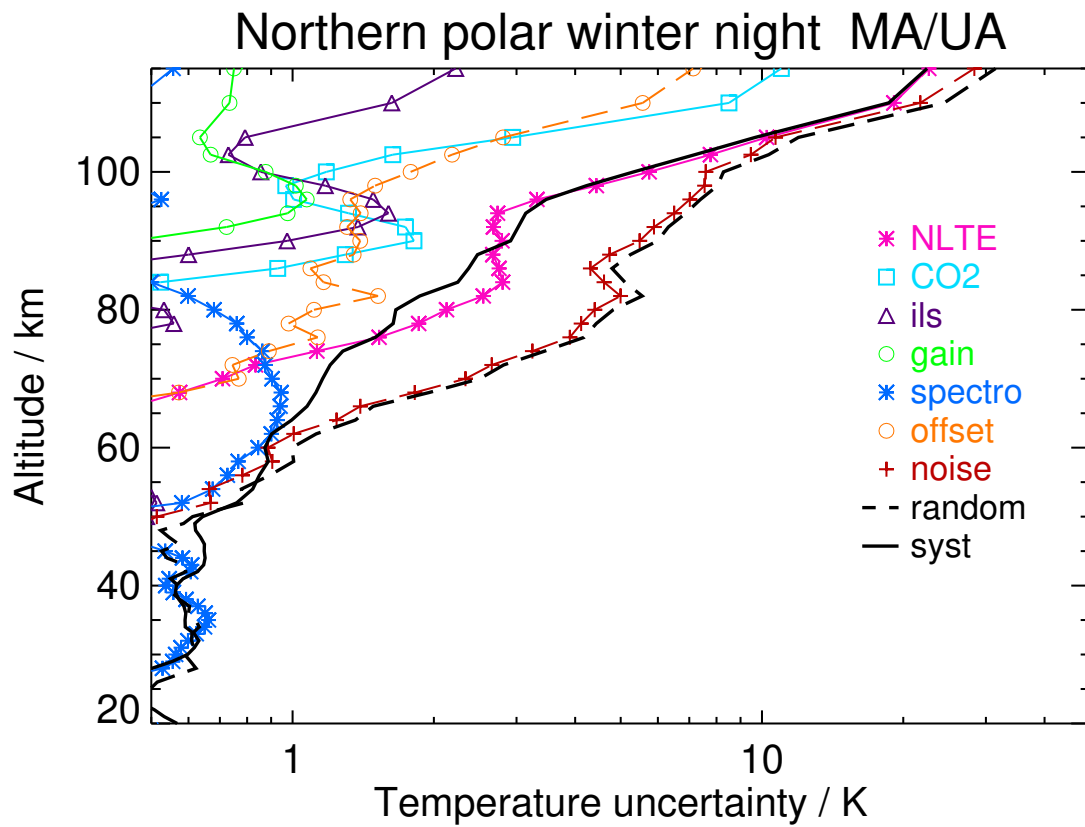

**Figure S2.** Temperature uncertainties for Northern polar winter nighttime conditions.

**Table S3.** Temperature error budget for Northern polar spring day. All uncertainties are  $1\sigma$ .

| altitude<br>(km) | mean target<br>(K) | NLTE<br>(K) | CO2<br>(K) | ils<br>(K) | gain<br>(K) | spectro<br>(K) | offset<br>(K) | noise<br>(K) | random<br>(K) | syst<br>(K) |
|------------------|--------------------|-------------|------------|------------|-------------|----------------|---------------|--------------|---------------|-------------|
| 20               | 215.4              | <0.1        | <0.1       | 0.2        | 0.4         | 0.2            | <0.1          | 0.4          | 0.4           | 0.4         |
| 30               | 216.9              | <0.1        | <0.1       | 0.5        | 0.3         | 0.5            | <0.1          | 0.3          | 0.4           | 0.7         |
| 40               | 248.1              | <0.1        | <0.1       | 0.2        | 0.4         | 0.7            | <0.1          | 0.3          | 0.5           | 0.8         |
| 50               | 270.1              | <0.1        | <0.1       | 0.5        | 0.3         | 0.4            | 0.1           | 0.4          | 0.5           | 0.7         |
| 60               | 254.7              | 0.1         | <0.1       | 0.3        | 0.2         | 1.0            | 0.2           | 0.7          | 0.8           | 1.0         |
| 70               | 222.2              | 0.2         | 0.2        | 0.4        | 0.2         | 0.9            | 0.8           | 2.2          | 2.4           | 1.0         |
| 80               | 199.6              | 0.5         | <0.1       | 0.6        | 0.2         | 0.6            | 0.9           | 4.4          | 4.6           | 0.7         |
| 90               | 179.9              | 1.0         | 1.2        | 0.9        | 0.4         | 0.2            | 1.4           | 5.8          | 6.0           | 1.6         |
| 100              | 181.4              | 7.6         | 1.7        | 0.8        | 1.3         | 0.8            | 2.4           | 8.2          | 8.9           | 7.5         |
| 110              | 283.4              | 31.1        | 7.6        | 4.1        | 1.2         | 0.8            | 5.7           | 20.7         | 23.0          | 31.2        |
| 115              | 354.7              | 37.8        | 10.0       | 5.8        | 1.2         | 0.9            | 7.8           | 27.7         | 30.4          | 38.4        |

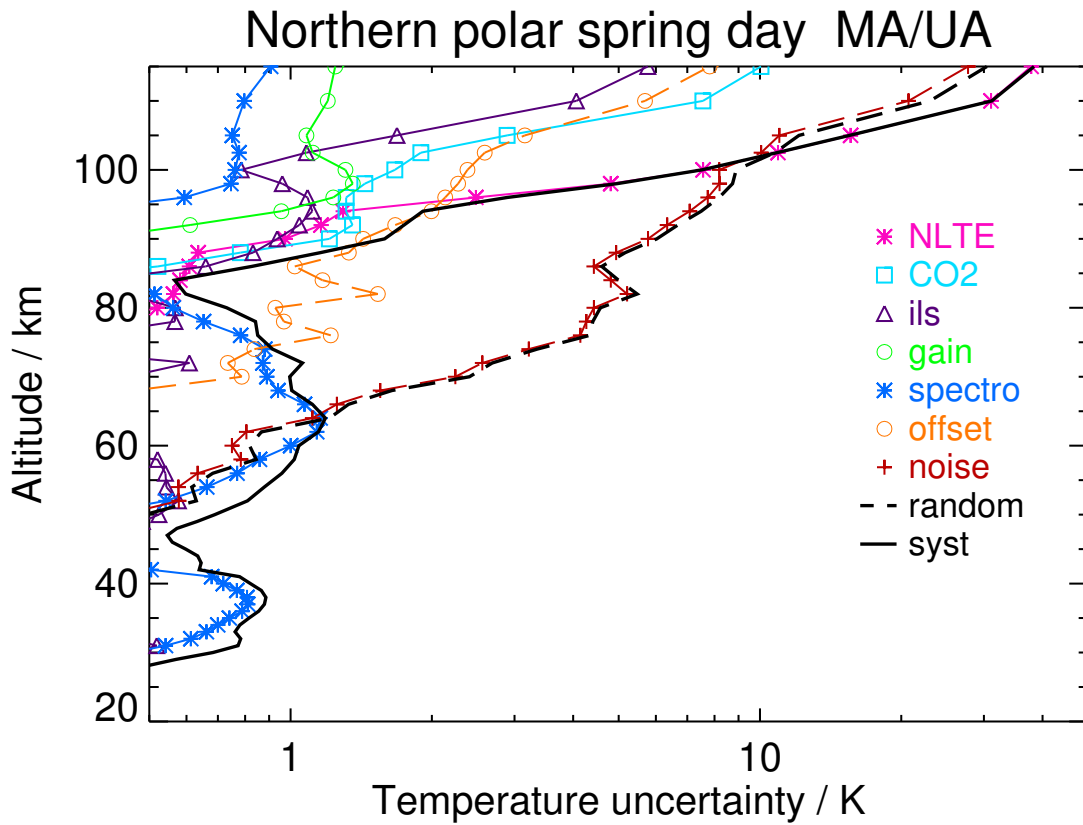**Figure S3.** Temperature uncertainties for Northern polar spring daytime conditions.

**Table S4.** Temperature error budget for Northern polar spring night. All uncertainties are  $1\sigma$ .

| altitude<br>(km) | mean target<br>(K) | NLTE<br>(K) | CO2<br>(K) | ils<br>(K) | gain<br>(K) | spectro<br>(K) | offset<br>(K) | noise<br>(K) | random<br>(K) | syst<br>(K) |
|------------------|--------------------|-------------|------------|------------|-------------|----------------|---------------|--------------|---------------|-------------|
| 20               | 215.8              | <0.1        | <0.1       | 0.2        | 0.4         | 0.2            | <0.1          | 0.3          | 0.4           | 0.4         |
| 30               | 218.0              | <0.1        | <0.1       | 0.5        | 0.3         | 0.5            | <0.1          | 0.3          | 0.4           | 0.7         |
| 40               | 247.8              | <0.1        | <0.1       | 0.2        | 0.4         | 0.7            | <0.1          | 0.3          | 0.4           | 0.8         |
| 50               | 265.9              | <0.1        | <0.1       | 0.5        | 0.3         | 0.4            | 0.1           | 0.4          | 0.5           | 0.7         |
| 60               | 249.5              | 0.1         | <0.1       | 0.2        | 0.2         | 1.0            | 0.3           | 0.8          | 0.8           | 1.0         |
| 70               | 221.4              | 0.2         | 0.2        | 0.5        | 0.2         | 1.0            | 0.8           | 2.3          | 2.4           | 1.1         |
| 80               | 200.3              | 0.6         | <0.1       | 0.6        | 0.2         | 0.7            | 1.0           | 4.5          | 4.7           | 0.9         |
| 90               | 189.5              | 1.6         | 1.2        | 1.2        | 0.4         | 0.2            | 1.5           | 5.8          | 6.1           | 2.1         |
| 100              | 189.7              | 8.4         | 1.3        | 0.7        | 1.3         | 0.7            | 2.0           | 7.9          | 8.6           | 8.2         |
| 110              | 271.8              | 30.6        | 6.7        | 2.8        | 0.9         | 0.6            | 4.7           | 18.4         | 22.1          | 29.4        |
| 115              | 332.6              | 38.1        | 9.6        | 4.2        | 0.9         | 0.7            | 6.8           | 26.5         | 30.7          | 37.0        |

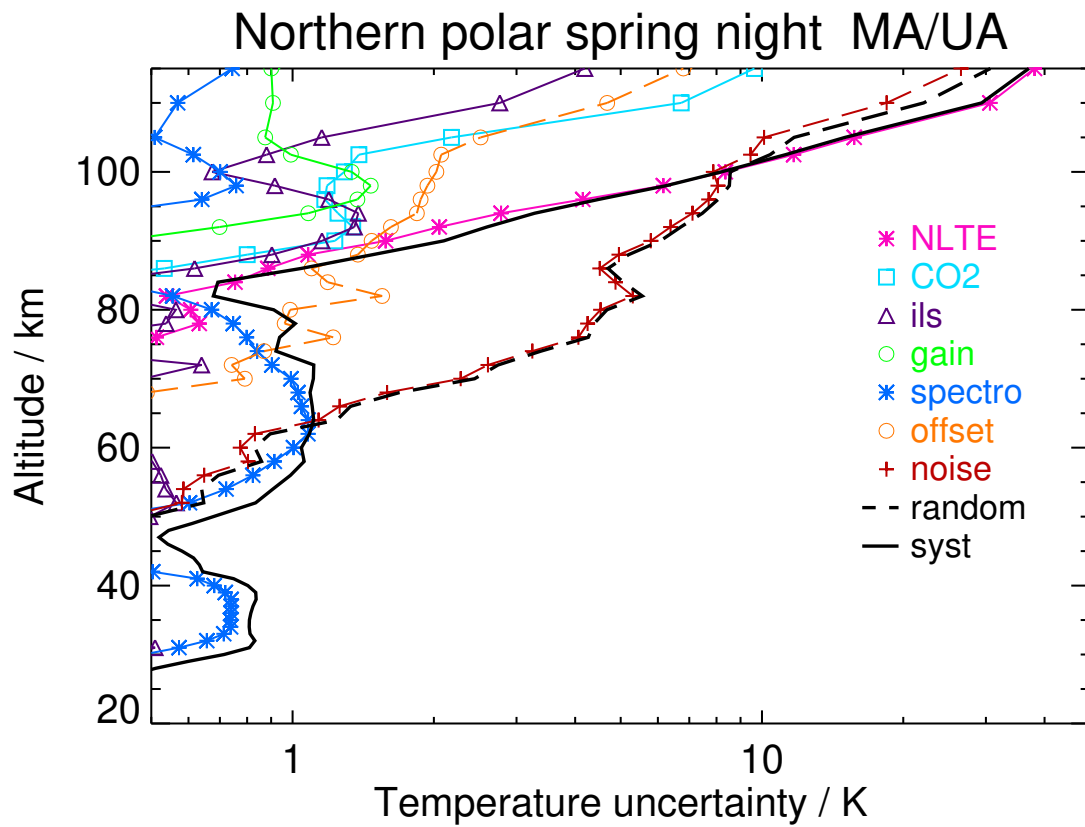

**Figure S4.** Temperature uncertainties for Northern polar spring nighttime conditions.

**Table S5.** Temperature error budget for Northern polar summer day. All uncertainties are  $1\sigma$ .

| altitude<br>(km) | mean target<br>(K) | NLTE<br>(K) | CO2<br>(K) | ils<br>(K) | gain<br>(K) | spectro<br>(K) | offset<br>(K) | noise<br>(K) | random<br>(K) | syst<br>(K) |
|------------------|--------------------|-------------|------------|------------|-------------|----------------|---------------|--------------|---------------|-------------|
| 20               | 228.5              | <0.1        | <0.1       | 0.2        | 0.4         | 0.1            | <0.1          | 0.3          | 0.4           | 0.4         |
| 30               | 236.0              | <0.1        | <0.1       | 0.5        | 0.3         | 0.3            | <0.1          | 0.2          | 0.3           | 0.7         |
| 40               | 260.9              | <0.1        | <0.1       | 0.3        | 0.4         | 0.5            | <0.1          | 0.3          | 0.3           | 0.7         |
| 50               | 278.0              | <0.1        | <0.1       | 0.5        | 0.3         | 0.2            | 0.1           | 0.4          | 0.4           | 0.6         |
| 60               | 262.4              | <0.1        | <0.1       | 0.3        | 0.2         | 1.0            | 0.2           | 0.7          | 0.7           | 1.1         |
| 70               | 218.3              | <0.1        | 0.1        | 0.6        | 0.2         | 1.2            | 0.8           | 2.0          | 2.2           | 1.3         |
| 80               | 157.9              | 1.2         | 0.4        | 0.8        | 0.2         | 0.6            | 1.0           | 5.2          | 5.4           | 1.5         |
| 90               | 141.0              | 1.1         | 1.0        | 0.5        | 0.3         | 0.1            | 2.3           | 6.2          | 6.7           | 1.4         |
| 100              | 228.8              | 22.5        | 6.5        | 1.5        | 1.3         | 0.7            | 2.4           | 8.4          | 11.2          | 22.4        |
| 110              | 323.6              | 43.0        | 17.5       | 6.0        | 1.6         | 0.9            | 6.3           | 23.1         | 25.6          | 46.0        |
| 115              | 368.9              | 46.8        | 20.4       | 7.5        | 1.7         | 1.0            | 8.1           | 28.8         | 31.2          | 50.8        |

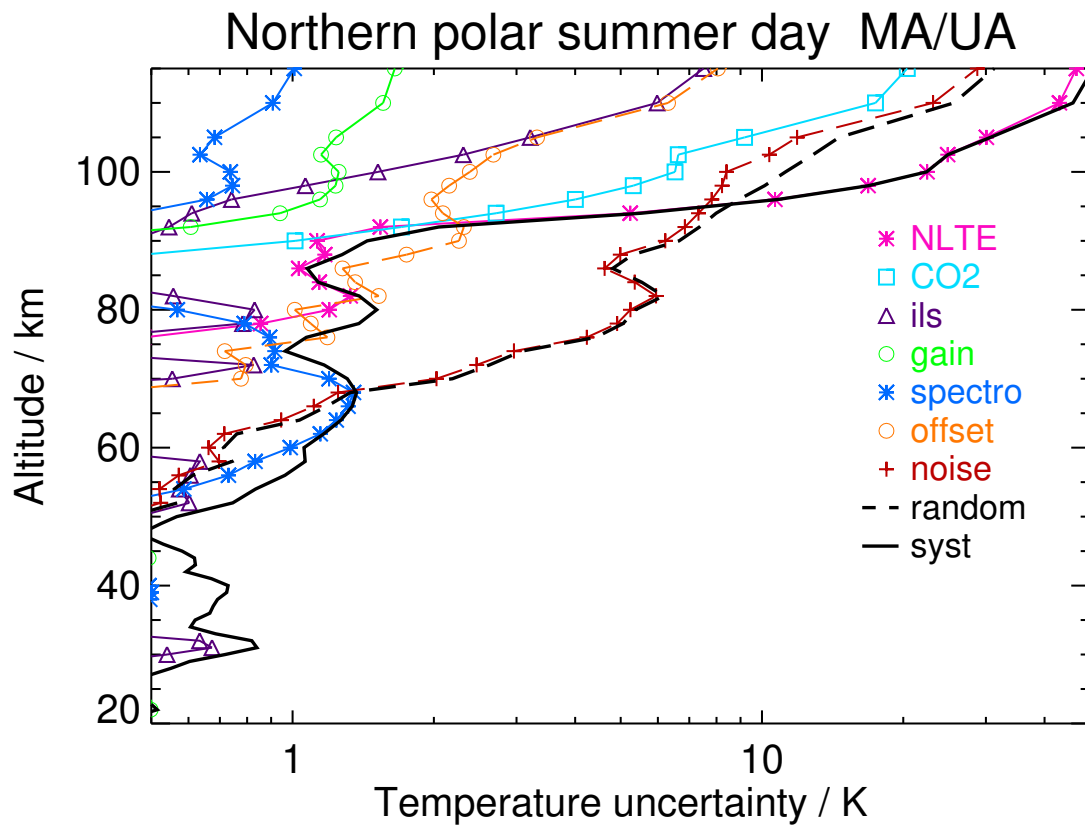**Figure S5.** Temperature uncertainties for Northern polar summer daytime conditions.



**Table S6.** Temperature error budget for Northern polar summer night. All uncertainties are  $1\sigma$ .

| altitude<br>(km) | mean target<br>(K) | NLTE<br>(K) | CO2<br>(K) | ils<br>(K) | gain<br>(K) | spectro<br>(K) | offset<br>(K) | noise<br>(K) | random<br>(K) | syst<br>(K) |
|------------------|--------------------|-------------|------------|------------|-------------|----------------|---------------|--------------|---------------|-------------|
| 20               | 223.4              | <0.1        | <0.1       | 0.1        | 0.4         | 0.2            | <0.1          | 0.3          | 0.4           | 0.4         |
| 30               | 229.0              | <0.1        | <0.1       | 0.5        | 0.4         | 0.3            | <0.1          | 0.3          | 0.3           | 0.7         |
| 40               | 250.7              | <0.1        | <0.1       | 0.3        | 0.4         | 0.5            | <0.1          | 0.3          | 0.3           | 0.7         |
| 50               | 266.2              | <0.1        | <0.1       | 0.5        | 0.3         | 0.3            | 0.1           | 0.4          | 0.5           | 0.6         |
| 60               | 249.4              | <0.1        | <0.1       | 0.3        | 0.2         | 1.1            | 0.2           | 0.7          | 0.8           | 1.1         |
| 70               | 210.1              | <0.1        | 0.1        | 0.6        | 0.1         | 1.0            | 0.8           | 2.4          | 2.5           | 1.2         |
| 80               | 171.6              | 0.7         | 0.2        | 0.4        | 0.2         | 0.5            | 1.2           | 5.3          | 5.4           | 0.8         |
| 90               | 172.5              | 1.0         | 1.1        | 1.5        | 0.7         | 0.2            | 1.9           | 6.3          | 6.6           | 2.0         |
| 100              | 210.5              | 13.2        | 2.5        | 0.4        | 0.9         | 0.4            | 1.9           | 7.7          | 8.4           | 13.2        |
| 110              | 290.9              | 35.4        | 12.7       | 3.4        | 1.1         | 0.7            | 5.2           | 21.3         | 23.7          | 36.6        |
| 115              | 350.6              | 40.8        | 16.3       | 4.9        | 1.1         | 0.8            | 7.0           | 28.1         | 30.8          | 42.9        |

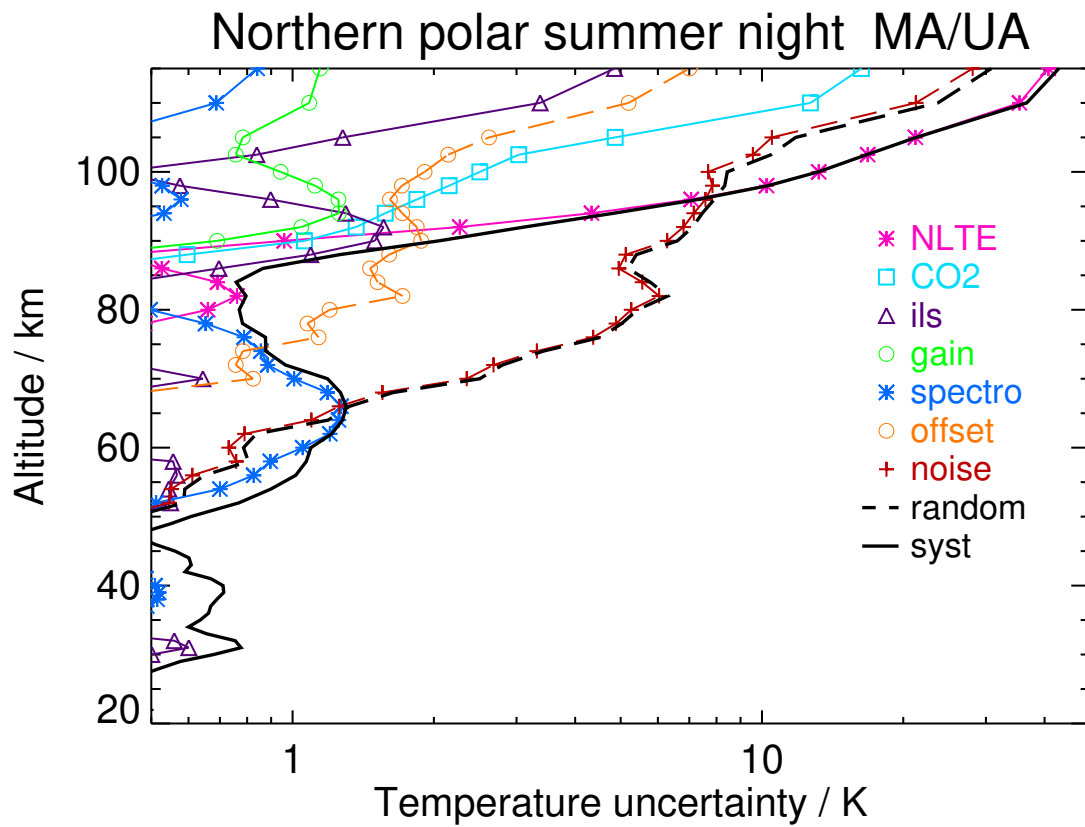

**Figure S6.** Temperature uncertainties for Northern polar summer nighttime conditions.

**Table S7.** Temperature error budget for Northern polar autumn day. All uncertainties are  $1\sigma$ .

| altitude<br>(km) | mean target<br>(K) | NLTE<br>(K) | CO2<br>(K) | ils<br>(K) | gain<br>(K) | spectro<br>(K) | offset<br>(K) | noise<br>(K) | random<br>(K) | syst<br>(K) |
|------------------|--------------------|-------------|------------|------------|-------------|----------------|---------------|--------------|---------------|-------------|
| 20               | 215.0              | <0.1        | <0.1       | 0.2        | 0.4         | 0.4            | <0.1          | 0.4          | 0.4           | 0.5         |
| 30               | 214.3              | <0.1        | <0.1       | 0.4        | 0.4         | 0.2            | <0.1          | 0.3          | 0.4           | 0.6         |
| 40               | 233.1              | <0.1        | <0.1       | 0.2        | 0.4         | 0.5            | 0.1           | 0.3          | 0.4           | 0.6         |
| 50               | 252.7              | <0.1        | <0.1       | 0.5        | 0.4         | 0.3            | 0.1           | 0.5          | 0.5           | 0.6         |
| 60               | 244.4              | 0.1         | <0.1       | 0.3        | 0.3         | 0.9            | 0.3           | 0.8          | 0.9           | 1.0         |
| 70               | 224.7              | 0.4         | 0.3        | 0.4        | 0.2         | 0.9            | 0.8           | 2.4          | 2.5           | 1.0         |
| 80               | 204.5              | 0.7         | <0.1       | 0.4        | 0.2         | 0.6            | 0.9           | 4.4          | 4.5           | 0.9         |
| 90               | 192.8              | 1.1         | 1.4        | 0.8        | 0.3         | 0.2            | 1.4           | 5.8          | 6.0           | 1.7         |
| 100              | 187.9              | 5.6         | 1.0        | 1.1        | 1.2         | 0.7            | 1.9           | 7.5          | 8.0           | 5.6         |
| 110              | 243.2              | 20.2        | 5.4        | 2.0        | 0.8         | 0.5            | 5.4           | 20.8         | 23.4          | 18.9        |
| 115              | 301.5              | 24.7        | 7.2        | 2.9        | 0.8         | 0.6            | 7.0           | 28.0         | 31.0          | 23.2        |

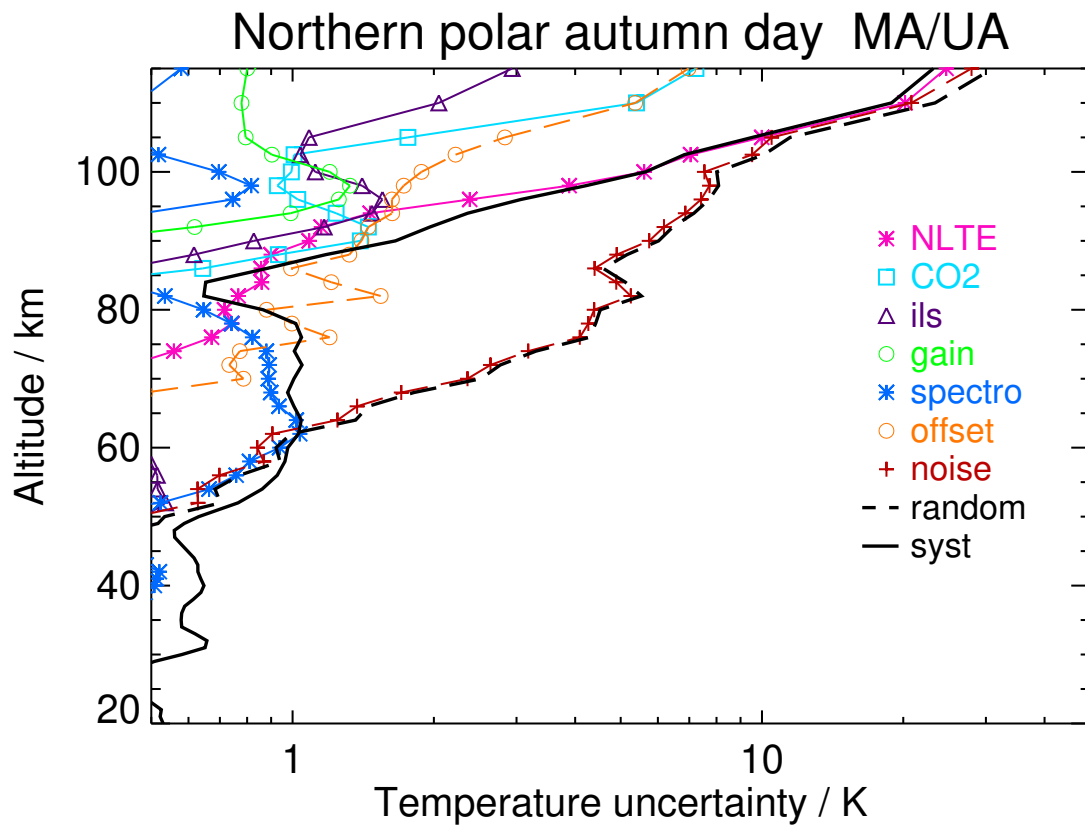**Figure S7.** Temperature uncertainties for Northern polar autumn daytime conditions.

**Table S8.** Temperature error budget for Northern polar autumn night. All uncertainties are  $1\sigma$ .

| altitude<br>(km) | mean target<br>(K) | NLTE<br>(K) | CO2<br>(K) | ils<br>(K) | gain<br>(K) | spectro<br>(K) | offset<br>(K) | noise<br>(K) | random<br>(K) | syst<br>(K) |
|------------------|--------------------|-------------|------------|------------|-------------|----------------|---------------|--------------|---------------|-------------|
| 20               | 212.9              | <0.1        | <0.1       | 0.2        | 0.4         | 0.4            | <0.1          | 0.3          | 0.4           | 0.6         |
| 30               | 211.0              | <0.1        | <0.1       | 0.4        | 0.4         | 0.2            | <0.1          | 0.3          | 0.3           | 0.6         |
| 40               | 229.1              | <0.1        | <0.1       | 0.1        | 0.4         | 0.6            | 0.1           | 0.4          | 0.5           | 0.7         |
| 50               | 252.4              | <0.1        | <0.1       | 0.5        | 0.4         | 0.3            | 0.1           | 0.5          | 0.6           | 0.6         |
| 60               | 249.4              | 0.2         | <0.1       | 0.2        | 0.3         | 0.9            | 0.2           | 0.8          | 0.9           | 1.0         |
| 70               | 228.4              | 0.5         | 0.3        | 0.4        | 0.2         | 1.0            | 0.8           | 2.3          | 2.5           | 1.1         |
| 80               | 206.8              | 1.0         | <0.1       | 0.5        | 0.2         | 0.7            | 1.1           | 4.6          | 4.8           | 1.1         |
| 90               | 196.4              | 1.4         | 1.4        | 0.9        | 0.4         | 0.2            | 1.4           | 5.6          | 5.9           | 2.0         |
| 100              | 191.1              | 6.2         | 1.0        | 0.9        | 1.1         | 0.5            | 1.8           | 7.6          | 8.1           | 6.1         |
| 110              | 244.4              | 19.1        | 5.9        | 1.4        | 0.7         | 0.4            | 5.0           | 20.3         | 22.3          | 18.5        |
| 115              | 301.2              | 23.7        | 8.3        | 2.2        | 0.7         | 0.5            | 6.6           | 27.7         | 30.1          | 23.3        |

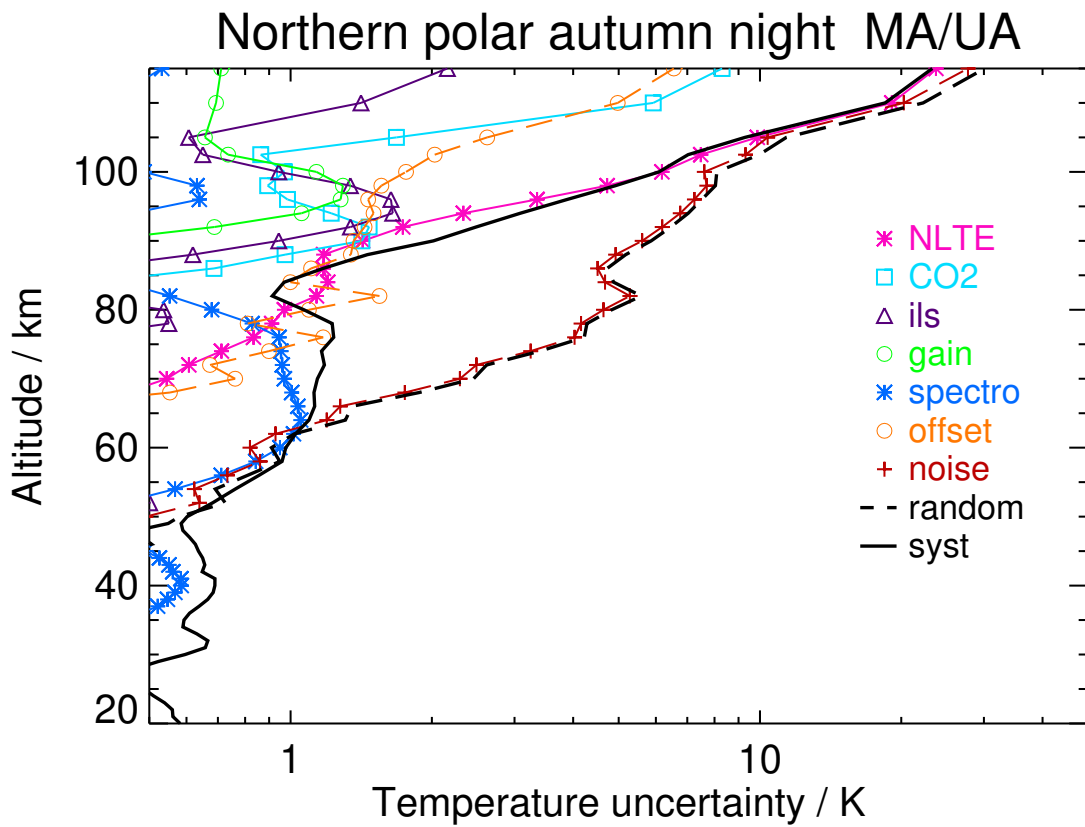

**Figure S8.** Temperature uncertainties for Northern polar autumn nighttime conditions.

**Table S9.** Temperature error budget for Northern midlatitude winter day. All uncertainties are  $1\sigma$ .

| altitude<br>(km) | mean target<br>(K) | NLTE<br>(K) | CO2<br>(K) | ils<br>(K) | gain<br>(K) | spectro<br>(K) | offset<br>(K) | noise<br>(K) | random<br>(K) | syst<br>(K) |
|------------------|--------------------|-------------|------------|------------|-------------|----------------|---------------|--------------|---------------|-------------|
| 20               | 215.0              | <0.1        | <0.1       | 0.1        | 0.5         | 0.2            | <0.1          | 0.3          | 0.4           | 0.5         |
| 30               | 221.0              | <0.1        | <0.1       | 0.4        | 0.3         | 0.4            | <0.1          | 0.3          | 0.4           | 0.6         |
| 40               | 236.2              | <0.1        | <0.1       | 0.1        | 0.4         | 0.4            | <0.1          | 0.3          | 0.4           | 0.5         |
| 50               | 251.7              | <0.1        | <0.1       | 0.5        | 0.3         | 0.4            | 0.1           | 0.5          | 0.5           | 0.7         |
| 60               | 238.0              | <0.1        | <0.1       | 0.3        | 0.2         | 1.0            | 0.2           | 0.8          | 0.9           | 1.0         |
| 70               | 218.0              | 0.2         | 0.2        | 0.5        | 0.2         | 0.9            | 0.7           | 2.4          | 2.5           | 1.0         |
| 80               | 207.6              | 0.9         | 0.1        | 0.6        | 0.2         | 0.7            | 1.3           | 4.7          | 4.9           | 1.0         |
| 90               | 198.0              | 1.8         | 1.6        | 0.9        | 0.4         | 0.3            | 1.4           | 5.6          | 6.0           | 2.0         |
| 100              | 199.7              | 6.9         | 1.4        | 0.6        | 1.0         | 0.5            | 1.9           | 7.3          | 8.0           | 6.6         |
| 110              | 250.2              | 24.0        | 7.7        | 2.5        | 1.0         | 0.6            | 5.1           | 19.9         | 23.8          | 22.3        |
| 115              | 313.1              | 29.0        | 10.3       | 3.7        | 1.0         | 0.8            | 7.0           | 27.4         | 31.6          | 27.6        |

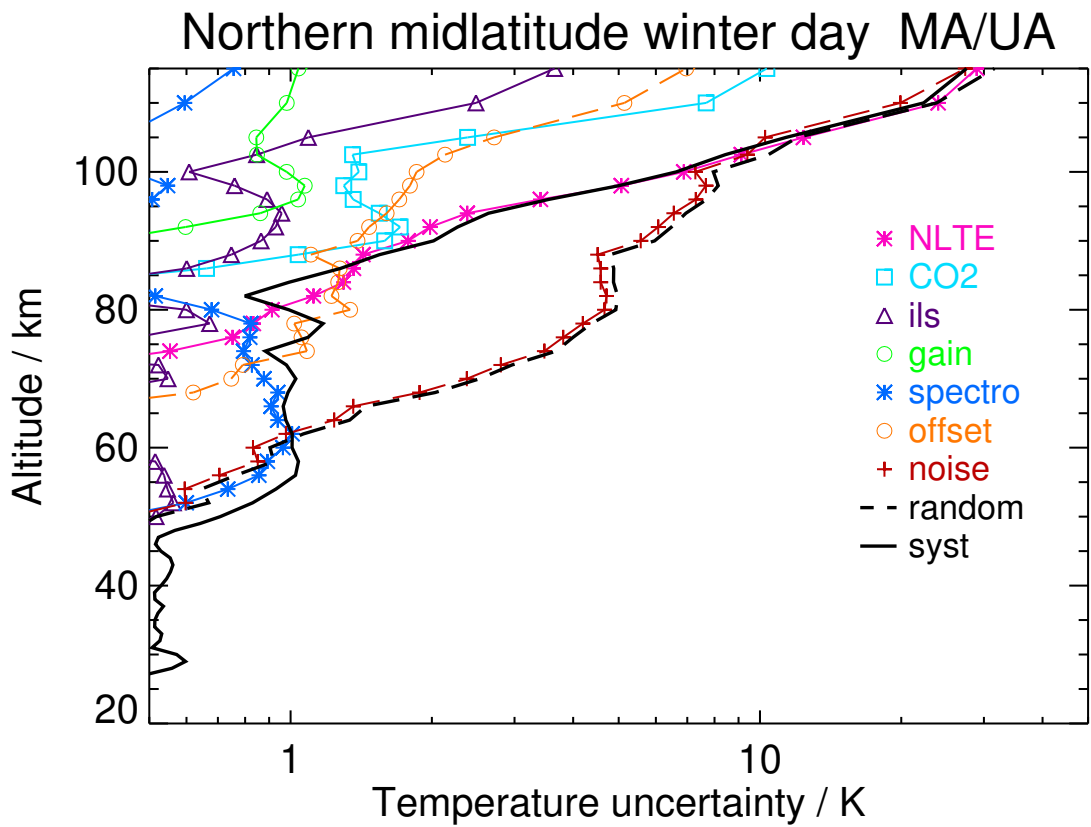

**Figure S9.** Temperature uncertainties for Northern midlatitude winter daytime conditions.

**Table S10.** Temperature error budget for Northern midlatitude winter night. All uncertainties are  $1\sigma$ .

| altitude<br>(km) | mean target<br>(K) | NLTE<br>(K) | CO2<br>(K) | ils<br>(K) | gain<br>(K) | spectro<br>(K) | offset<br>(K) | noise<br>(K) | random<br>(K) | syst<br>(K) |
|------------------|--------------------|-------------|------------|------------|-------------|----------------|---------------|--------------|---------------|-------------|
| 20               | 216.8              | <0.1        | <0.1       | 0.2        | 0.4         | 0.3            | <0.1          | 0.2          | 0.4           | 0.5         |
| 30               | 221.4              | <0.1        | <0.1       | 0.5        | 0.4         | 0.4            | <0.1          | 0.3          | 0.4           | 0.7         |
| 40               | 240.2              | <0.1        | <0.1       | 0.2        | 0.4         | 0.6            | <0.1          | 0.3          | 0.4           | 0.7         |
| 50               | 251.1              | <0.1        | <0.1       | 0.5        | 0.3         | 0.5            | 0.1           | 0.5          | 0.6           | 0.7         |
| 60               | 234.4              | 0.1         | <0.1       | 0.4        | 0.3         | 0.9            | 0.2           | 0.9          | 1.0           | 1.0         |
| 70               | 221.3              | 0.4         | 0.3        | 0.5        | 0.2         | 0.8            | 0.7           | 2.3          | 2.4           | 1.0         |
| 80               | 215.1              | 1.7         | <0.1       | 0.5        | 0.3         | 0.7            | 1.1           | 4.4          | 4.7           | 1.6         |
| 90               | 197.3              | 2.1         | 1.5        | 1.0        | 0.4         | 0.3            | 1.5           | 5.7          | 6.1           | 2.4         |
| 100              | 195.4              | 6.9         | 1.3        | 0.5        | 0.9         | 0.5            | 1.8           | 7.4          | 8.1           | 6.5         |
| 110              | 241.6              | 19.9        | 8.3        | 1.6        | 0.6         | 0.5            | 5.4           | 21.0         | 24.5          | 18.3        |
| 115              | 304.3              | 24.5        | 11.1       | 2.5        | 0.6         | 0.6            | 7.0           | 27.9         | 32.1          | 23.1        |

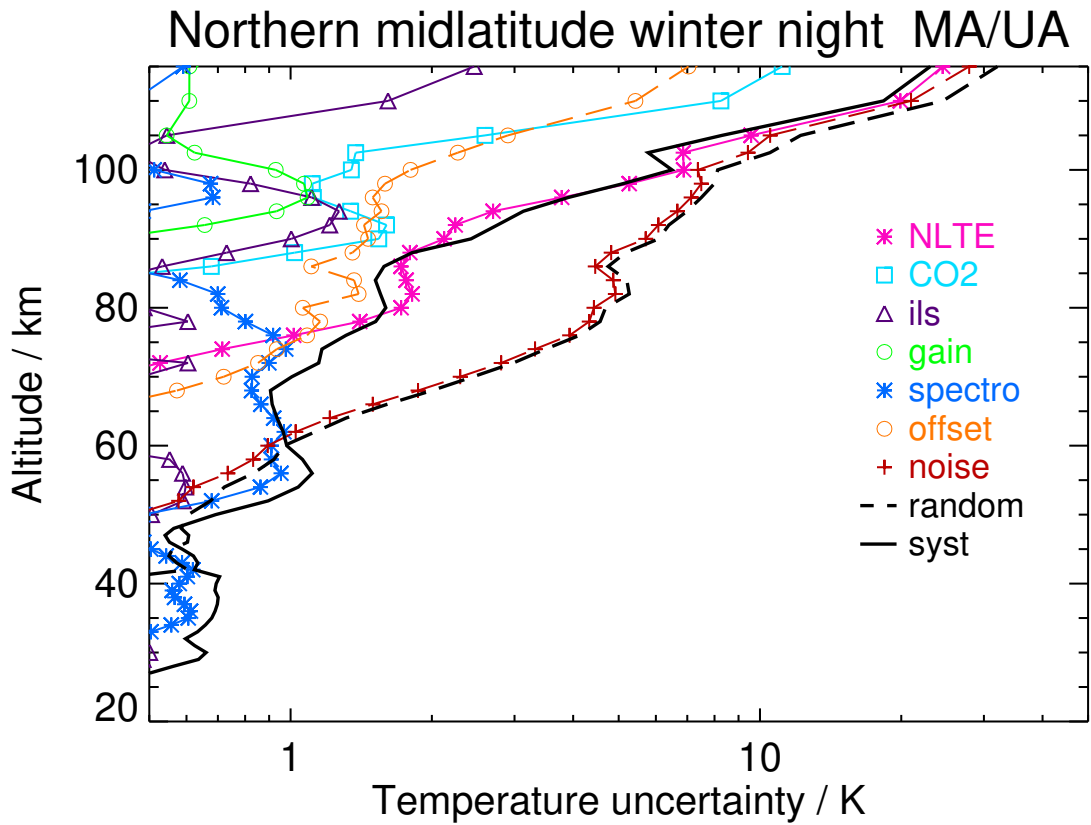

**Figure S10.** Temperature uncertainties for Northern midlatitude winter nighttime conditions.

**Table S11.** Temperature error budget for Northern midlatitude spring day. All uncertainties are  $1\sigma$ .

| altitude<br>(km) | mean target<br>(K) | NLTE<br>(K) | CO2<br>(K) | ils<br>(K) | gain<br>(K) | spectro<br>(K) | offset<br>(K) | noise<br>(K) | random<br>(K) | syst<br>(K) |
|------------------|--------------------|-------------|------------|------------|-------------|----------------|---------------|--------------|---------------|-------------|
| 20               | 215.4              | <0.1        | <0.1       | 0.2        | 0.3         | 0.2            | <0.1          | 0.3          | 0.4           | 0.4         |
| 30               | 226.6              | <0.1        | <0.1       | 0.5        | 0.3         | 0.4            | <0.1          | 0.3          | 0.4           | 0.7         |
| 40               | 252.6              | <0.1        | <0.1       | 0.3        | 0.4         | 0.5            | <0.1          | 0.3          | 0.4           | 0.7         |
| 50               | 262.3              | <0.1        | <0.1       | 0.5        | 0.3         | 0.4            | 0.1           | 0.4          | 0.5           | 0.7         |
| 60               | 243.2              | <0.1        | <0.1       | 0.3        | 0.2         | 1.0            | 0.3           | 0.8          | 0.9           | 1.1         |
| 70               | 216.1              | 0.1         | 0.2        | 0.5        | 0.2         | 0.9            | 0.7           | 2.3          | 2.4           | 1.0         |
| 80               | 187.7              | 0.6         | 0.1        | 0.6        | 0.2         | 0.6            | 0.9           | 4.7          | 4.8           | 0.9         |
| 90               | 182.2              | 1.2         | 1.2        | 1.0        | 0.4         | 0.2            | 1.5           | 5.9          | 6.2           | 1.6         |
| 100              | 191.9              | 9.3         | 1.7        | 0.5        | 1.1         | 0.7            | 2.3           | 7.8          | 8.7           | 9.0         |
| 110              | 260.4              | 27.1        | 5.4        | 3.0        | 1.1         | 0.7            | 5.2           | 19.5         | 22.3          | 26.1        |
| 115              | 315.5              | 32.5        | 7.3        | 4.5        | 1.2         | 0.8            | 6.9           | 27.1         | 30.3          | 31.5        |

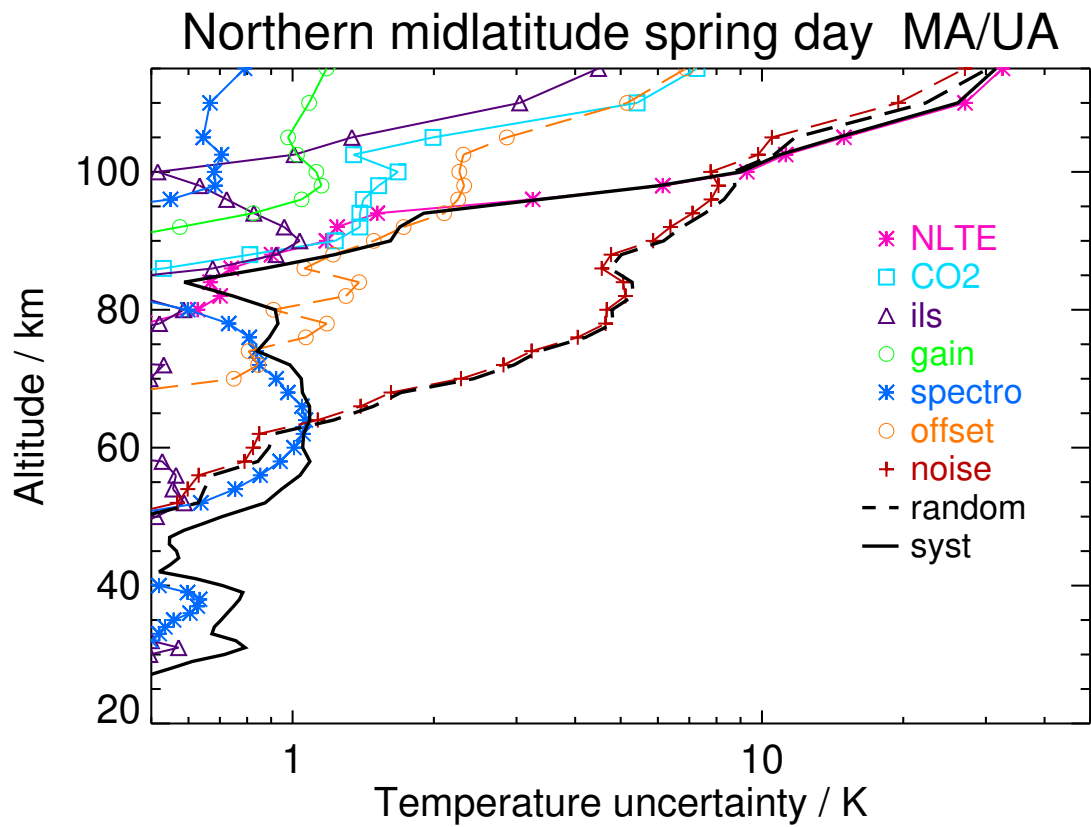**Figure S11.** Temperature uncertainties for Northern midlatitude spring daytime conditions.

**Table S12.** Temperature error budget for Northern midlatitude spring night. All uncertainties are  $1\sigma$ .

| altitude<br>(km) | mean target<br>(K) | NLTE<br>(K) | CO2<br>(K) | ils<br>(K) | gain<br>(K) | spectro<br>(K) | offset<br>(K) | noise<br>(K) | random<br>(K) | syst<br>(K) |
|------------------|--------------------|-------------|------------|------------|-------------|----------------|---------------|--------------|---------------|-------------|
| 20               | 215.8              | <0.1        | <0.1       | 0.2        | 0.3         | 0.2            | <0.1          | 0.3          | 0.4           | 0.4         |
| 30               | 222.6              | <0.1        | <0.1       | 0.5        | 0.3         | 0.5            | <0.1          | 0.3          | 0.4           | 0.7         |
| 40               | 249.8              | <0.1        | <0.1       | 0.2        | 0.4         | 0.6            | <0.1          | 0.3          | 0.4           | 0.7         |
| 50               | 263.7              | <0.1        | <0.1       | 0.5        | 0.3         | 0.4            | 0.1           | 0.4          | 0.5           | 0.7         |
| 60               | 243.8              | <0.1        | <0.1       | 0.3        | 0.2         | 1.0            | 0.3           | 0.8          | 0.9           | 1.1         |
| 70               | 216.2              | 0.2         | 0.2        | 0.5        | 0.2         | 0.9            | 0.8           | 2.3          | 2.5           | 1.1         |
| 80               | 195.5              | 0.6         | <0.1       | 0.4        | 0.2         | 0.6            | 1.0           | 4.6          | 4.8           | 0.7         |
| 90               | 182.4              | 1.4         | 1.2        | 1.0        | 0.4         | 0.2            | 1.7           | 6.1          | 6.4           | 1.8         |
| 100              | 195.1              | 9.6         | 1.4        | 0.6        | 1.2         | 0.7            | 2.0           | 7.9          | 8.6           | 9.5         |
| 110              | 265.2              | 28.4        | 5.7        | 2.7        | 0.9         | 0.5            | 4.4           | 17.9         | 20.7          | 27.5        |
| 115              | 311.7              | 34.1        | 8.1        | 4.1        | 1.0         | 0.7            | 6.2           | 26.2         | 29.2          | 33.5        |

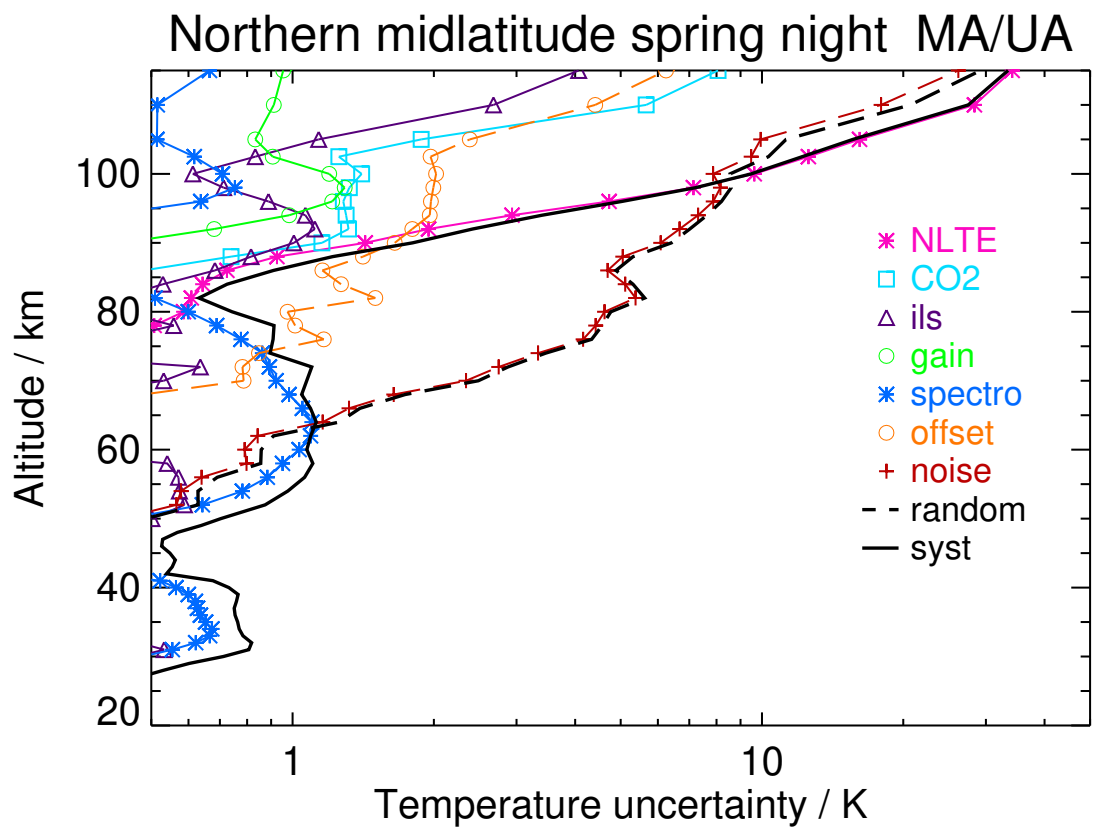

**Figure S12.** Temperature uncertainties for Northern midlatitude spring nighttime conditions.

**Table S13.** Temperature error budget for Northern midlatitude summer day. All uncertainties are  $1\sigma$ .

| altitude<br>(km) | mean target<br>(K) | NLTE<br>(K) | CO2<br>(K) | ils<br>(K) | gain<br>(K) | spectro<br>(K) | offset<br>(K) | noise<br>(K) | random<br>(K) | syst<br>(K) |
|------------------|--------------------|-------------|------------|------------|-------------|----------------|---------------|--------------|---------------|-------------|
| 20               | 221.5              | <0.1        | <0.1       | 0.2        | 0.4         | 0.1            | <0.1          | 0.3          | 0.4           | 0.4         |
| 30               | 232.7              | <0.1        | <0.1       | 0.5        | 0.4         | 0.4            | <0.1          | 0.3          | 0.3           | 0.7         |
| 40               | 256.0              | <0.1        | <0.1       | 0.3        | 0.5         | 0.5            | <0.1          | 0.3          | 0.3           | 0.7         |
| 50               | 267.0              | <0.1        | <0.1       | 0.5        | 0.3         | 0.3            | 0.1           | 0.4          | 0.5           | 0.7         |
| 60               | 246.1              | <0.1        | <0.1       | 0.3        | 0.2         | 1.1            | 0.3           | 0.8          | 0.8           | 1.2         |
| 70               | 204.8              | 0.2         | 0.1        | 0.6        | 0.2         | 0.9            | 0.8           | 2.4          | 2.5           | 1.1         |
| 80               | 165.0              | 1.1         | 0.2        | 0.5        | 0.2         | 0.4            | 1.0           | 5.1          | 5.2           | 1.1         |
| 90               | 169.3              | 1.0         | 1.1        | 1.3        | 0.6         | 0.2            | 1.8           | 6.1          | 6.5           | 1.8         |
| 100              | 210.3              | 14.0        | 3.8        | 0.5        | 0.8         | 0.4            | 2.0           | 7.6          | 8.9           | 14.0        |
| 110              | 311.4              | 39.1        | 16.9       | 4.0        | 1.2         | 0.8            | 5.6           | 21.9         | 25.5          | 41.1        |
| 115              | 374.8              | 43.7        | 20.2       | 5.4        | 1.3         | 0.9            | 7.5           | 27.8         | 31.4          | 46.8        |

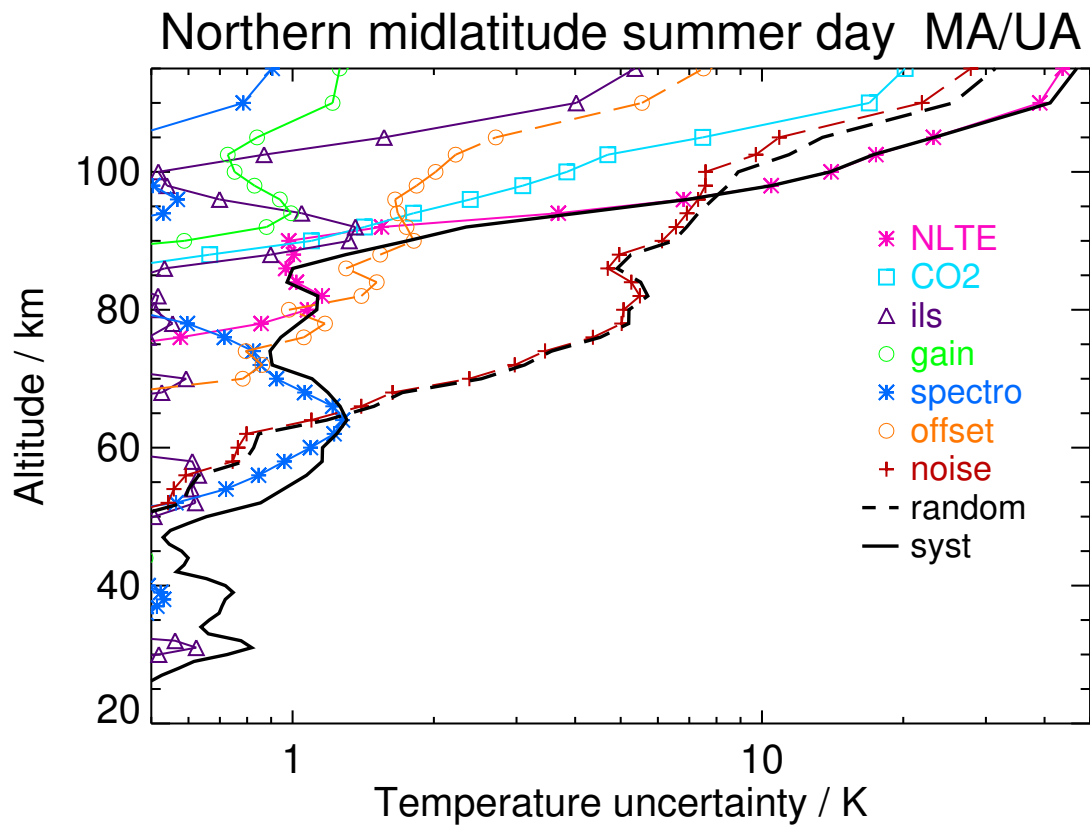

**Figure S13.** Temperature uncertainties for Northern midlatitude summer daytime conditions.



**Table S14.** Temperature error budget for Northern midlatitude summer night. All uncertainties are  $1\sigma$ .

| altitude<br>(km) | mean target<br>(K) | NLTE<br>(K) | CO2<br>(K) | ils<br>(K) | gain<br>(K) | spectro<br>(K) | offset<br>(K) | noise<br>(K) | random<br>(K) | syst<br>(K) |
|------------------|--------------------|-------------|------------|------------|-------------|----------------|---------------|--------------|---------------|-------------|
| 20               | 221.4              | <0.1        | <0.1       | 0.2        | 0.3         | 0.1            | <0.1          | 0.3          | 0.4           | 0.4         |
| 30               | 233.6              | <0.1        | <0.1       | 0.5        | 0.3         | 0.4            | <0.1          | 0.3          | 0.3           | 0.7         |
| 40               | 257.7              | <0.1        | <0.1       | 0.3        | 0.5         | 0.5            | <0.1          | 0.3          | 0.3           | 0.7         |
| 50               | 267.5              | <0.1        | <0.1       | 0.5        | 0.3         | 0.4            | 0.1           | 0.4          | 0.5           | 0.6         |
| 60               | 245.9              | <0.1        | <0.1       | 0.3        | 0.2         | 1.1            | 0.3           | 0.7          | 0.8           | 1.1         |
| 70               | 205.9              | <0.1        | 0.1        | 0.7        | 0.2         | 0.9            | 0.8           | 2.4          | 2.6           | 1.1         |
| 80               | 171.0              | 0.7         | 0.2        | 0.5        | 0.2         | 0.5            | 1.2           | 5.3          | 5.5           | 0.8         |
| 90               | 172.6              | 1.4         | 1.1        | 1.1        | 0.5         | 0.2            | 1.9           | 6.3          | 6.7           | 1.9         |
| 100              | 204.7              | 12.3        | 3.1        | 0.4        | 0.8         | 0.4            | 2.0           | 7.6          | 8.4           | 12.4        |
| 110              | 274.8              | 29.7        | 11.2       | 3.2        | 1.0         | 0.6            | 5.1           | 21.1         | 23.2          | 30.9        |
| 115              | 330.4              | 34.6        | 14.4       | 4.6        | 1.1         | 0.7            | 6.6           | 28.0         | 30.4          | 36.5        |

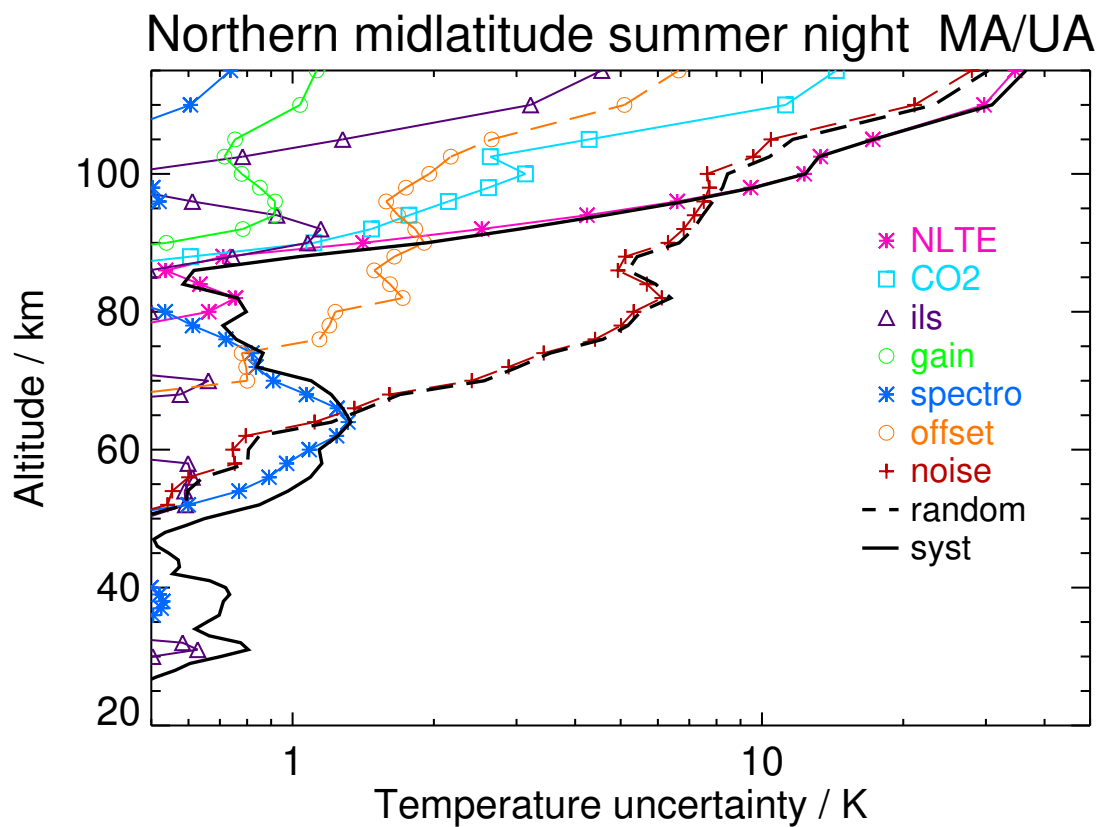

**Figure S14.** Temperature uncertainties for Northern midlatitude summer nighttime conditions.

**Table S15.** Temperature error budget for Northern midlatitude autumn day. All uncertainties are  $1\sigma$ .

| altitude<br>(km) | mean target<br>(K) | NLTE<br>(K) | CO2<br>(K) | ils<br>(K) | gain<br>(K) | spectro<br>(K) | offset<br>(K) | noise<br>(K) | random<br>(K) | syst<br>(K) |
|------------------|--------------------|-------------|------------|------------|-------------|----------------|---------------|--------------|---------------|-------------|
| 20               | 215.7              | <0.1        | <0.1       | 0.2        | 0.4         | 0.2            | <0.1          | 0.3          | 0.4           | 0.4         |
| 30               | 222.2              | <0.1        | <0.1       | 0.4        | 0.3         | 0.4            | <0.1          | 0.3          | 0.4           | 0.6         |
| 40               | 242.2              | <0.1        | <0.1       | 0.2        | 0.4         | 0.5            | <0.1          | 0.3          | 0.4           | 0.6         |
| 50               | 254.4              | <0.1        | <0.1       | 0.5        | 0.3         | 0.4            | 0.1           | 0.4          | 0.5           | 0.7         |
| 60               | 238.3              | <0.1        | <0.1       | 0.3        | 0.2         | 1.0            | 0.3           | 0.9          | 0.9           | 1.0         |
| 70               | 215.9              | 0.2         | 0.2        | 0.4        | 0.2         | 0.9            | 0.8           | 2.4          | 2.6           | 1.0         |
| 80               | 194.3              | 0.6         | <0.1       | 0.6        | 0.2         | 0.5            | 0.9           | 4.6          | 4.7           | 0.7         |
| 90               | 191.1              | 1.3         | 1.4        | 0.9        | 0.4         | 0.2            | 1.5           | 5.9          | 6.2           | 1.7         |
| 100              | 195.7              | 7.8         | 1.4        | 0.6        | 1.0         | 0.6            | 1.9           | 7.4          | 8.3           | 7.4         |
| 110              | 252.2              | 23.4        | 5.9        | 2.1        | 0.9         | 0.5            | 4.4           | 18.4         | 20.6          | 22.8        |
| 115              | 310.1              | 28.5        | 8.2        | 3.4        | 1.0         | 0.6            | 6.1           | 26.3         | 28.9          | 28.1        |

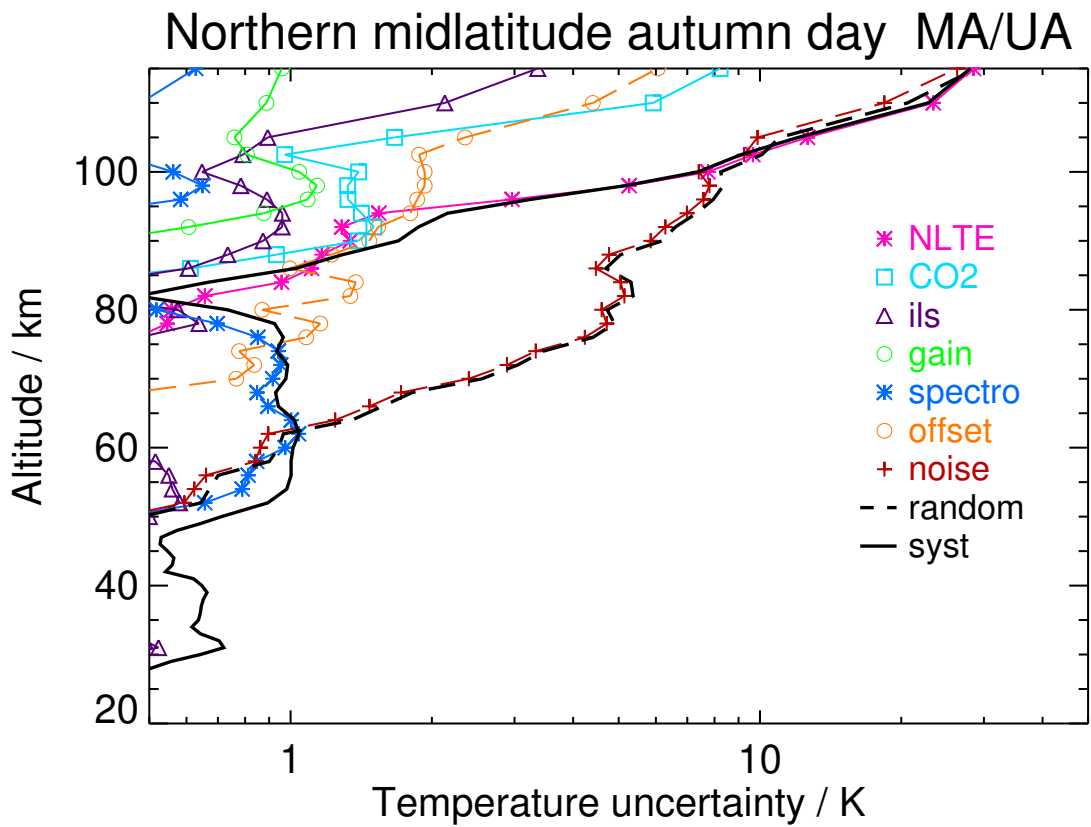

**Figure S15.** Temperature uncertainties for Northern midlatitude autumn daytime conditions.

**Table S16.** Temperature error budget for Northern midlatitude autumn night. All uncertainties are  $1\sigma$ .

| altitude<br>(km) | mean target<br>(K) | NLTE<br>(K) | CO2<br>(K) | ils<br>(K) | gain<br>(K) | spectro<br>(K) | offset<br>(K) | noise<br>(K) | random<br>(K) | syst<br>(K) |
|------------------|--------------------|-------------|------------|------------|-------------|----------------|---------------|--------------|---------------|-------------|
| 20               | 216.5              | <0.1        | <0.1       | 0.2        | 0.4         | 0.2            | <0.1          | 0.3          | 0.4           | 0.4         |
| 30               | 222.8              | <0.1        | <0.1       | 0.4        | 0.4         | 0.3            | <0.1          | 0.3          | 0.3           | 0.6         |
| 40               | 241.3              | <0.1        | <0.1       | 0.2        | 0.4         | 0.5            | <0.1          | 0.3          | 0.4           | 0.7         |
| 50               | 253.4              | <0.1        | <0.1       | 0.5        | 0.3         | 0.4            | 0.1           | 0.4          | 0.5           | 0.7         |
| 60               | 237.3              | <0.1        | <0.1       | 0.3        | 0.2         | 1.0            | 0.3           | 0.9          | 0.9           | 1.0         |
| 70               | 216.3              | 0.3         | 0.2        | 0.5        | 0.2         | 1.0            | 0.8           | 2.4          | 2.6           | 1.1         |
| 80               | 196.7              | 0.8         | <0.1       | 0.6        | 0.2         | 0.7            | 1.0           | 4.8          | 4.9           | 0.9         |
| 90               | 197.0              | 2.5         | 1.4        | 1.1        | 0.4         | 0.2            | 1.4           | 5.8          | 6.1           | 2.6         |
| 100              | 191.2              | 6.7         | 1.0        | 0.6        | 1.0         | 0.5            | 1.8           | 7.5          | 8.1           | 6.5         |
| 110              | 231.5              | 18.8        | 4.8        | 1.6        | 0.7         | 0.4            | 4.7           | 19.1         | 21.5          | 17.5        |
| 115              | 286.9              | 23.1        | 6.8        | 2.5        | 0.8         | 0.5            | 6.3           | 27.0         | 29.7          | 21.7        |

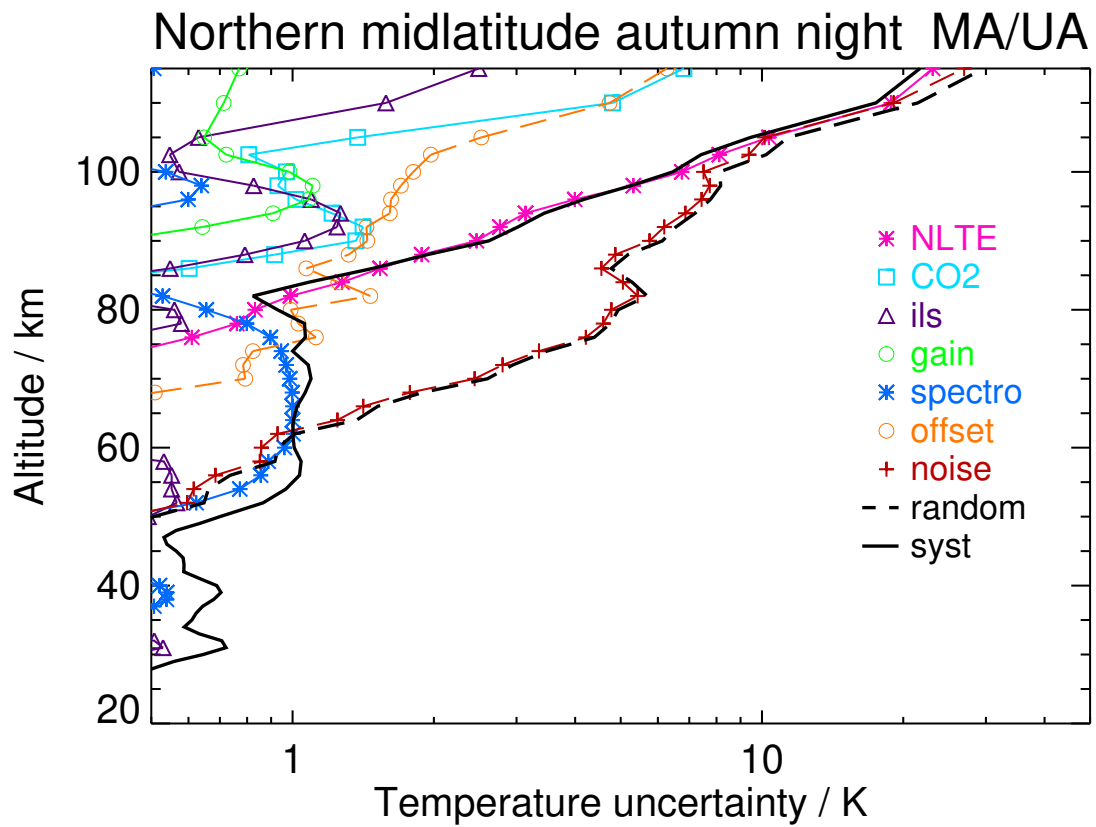

**Figure S16.** Temperature uncertainties for Northern midlatitude autumn nighttime conditions.

**Table S17.** Temperature error budget for Tropics day. All uncertainties are  $1\sigma$ .

| altitude (km) | mean target (K) | NLTE (K) | CO2 (K) | ils (K) | gain (K) | spectro (K) | offset (K) | noise (K) | random (K) | syst (K) |
|---------------|-----------------|----------|---------|---------|----------|-------------|------------|-----------|------------|----------|
| 20            | 203.2           | <0.1     | <0.1    | <0.1    | 0.2      | 0.8         | <0.1       | 0.2       | 0.3        | 0.8      |
| 30            | 230.1           | <0.1     | <0.1    | 0.5     | 0.3      | 0.5         | <0.1       | 0.3       | 0.3        | 0.7      |
| 40            | 254.4           | <0.1     | <0.1    | 0.3     | 0.4      | 0.6         | <0.1       | 0.3       | 0.4        | 0.7      |
| 50            | 263.7           | <0.1     | <0.1    | 0.5     | 0.3      | 0.4         | 0.1        | 0.4       | 0.5        | 0.7      |
| 60            | 241.9           | <0.1     | <0.1    | 0.4     | 0.2      | 1.1         | 0.3        | 0.8       | 0.9        | 1.2      |
| 70            | 207.7           | 0.2      | 0.2     | 0.6     | 0.2      | 1.0         | 0.7        | 2.3       | 2.5        | 1.1      |
| 80            | 190.0           | 0.6      | 0.1     | 0.7     | 0.2      | 0.5         | 1.1        | 4.8       | 4.9        | 0.8      |
| 90            | 193.4           | 1.6      | 1.5     | 1.1     | 0.4      | 0.2         | 1.4        | 5.7       | 6.1        | 2.0      |
| 100           | 190.8           | 5.7      | 1.3     | 0.5     | 0.7      | 0.3         | 1.8        | 7.0       | 7.6        | 5.4      |
| 110           | 239.9           | 19.1     | 7.6     | 1.9     | 0.8      | 0.4         | 4.5        | 18.7      | 21.3       | 18.6     |
| 115           | 295.7           | 23.8     | 10.4    | 3.2     | 0.9      | 0.6         | 6.1        | 26.5      | 29.5       | 23.6     |

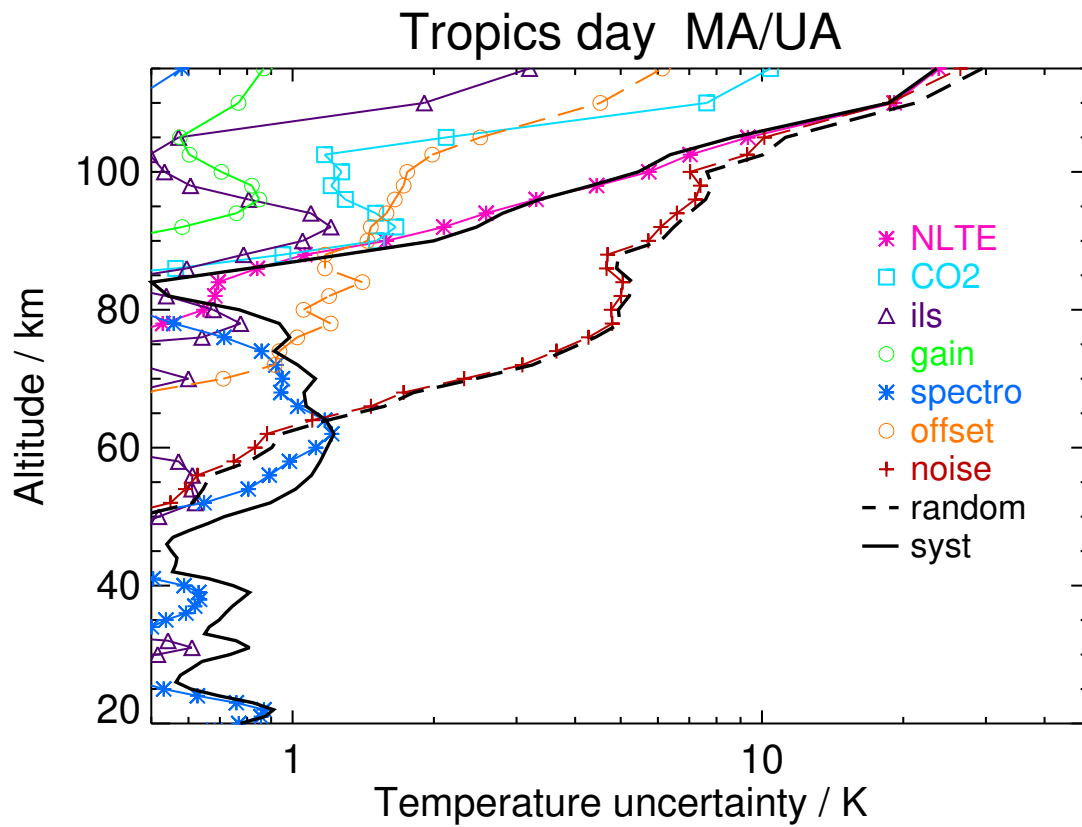

**Figure S17.** Temperature uncertainties for Tropics daytime conditions.

**Table S18.** Temperature error budget for Tropics night. All uncertainties are  $1\sigma$ .

| altitude<br>(km) | mean target<br>(K) | NLTE<br>(K) | CO2<br>(K) | ils<br>(K) | gain<br>(K) | spectro<br>(K) | offset<br>(K) | noise<br>(K) | random<br>(K) | syst<br>(K) |
|------------------|--------------------|-------------|------------|------------|-------------|----------------|---------------|--------------|---------------|-------------|
| 20               | 203.0              | <0.1        | <0.1       | <0.1       | 0.2         | 0.7            | <0.1          | 0.2          | 0.3           | 0.7         |
| 30               | 230.5              | <0.1        | <0.1       | 0.5        | 0.3         | 0.4            | <0.1          | 0.3          | 0.3           | 0.7         |
| 40               | 253.5              | <0.1        | <0.1       | 0.3        | 0.4         | 0.6            | <0.1          | 0.3          | 0.4           | 0.8         |
| 50               | 264.1              | <0.1        | <0.1       | 0.5        | 0.3         | 0.5            | 0.1           | 0.4          | 0.5           | 0.7         |
| 60               | 243.7              | <0.1        | <0.1       | 0.3        | 0.2         | 1.1            | 0.3           | 0.8          | 0.8           | 1.2         |
| 70               | 203.3              | <0.1        | <0.1       | 0.6        | 0.2         | 1.0            | 0.8           | 2.5          | 2.6           | 1.2         |
| 80               | 190.5              | 0.8         | <0.1       | 1.4        | 0.1         | 0.3            | 1.2           | 5.1          | 5.3           | 1.4         |
| 90               | 191.9              | 1.9         | 1.2        | 1.2        | 0.5         | 0.4            | 1.5           | 5.8          | 6.1           | 2.3         |
| 100              | 184.1              | 5.9         | 1.5        | 0.5        | 0.7         | 0.4            | 1.9           | 7.4          | 7.9           | 5.8         |
| 110              | 261.8              | 23.2        | 9.5        | 2.3        | 0.8         | 0.5            | 4.6           | 18.9         | 21.4          | 23.6        |
| 115              | 308.2              | 28.6        | 13.1       | 3.5        | 1.0         | 0.7            | 6.2           | 26.7         | 29.6          | 29.6        |

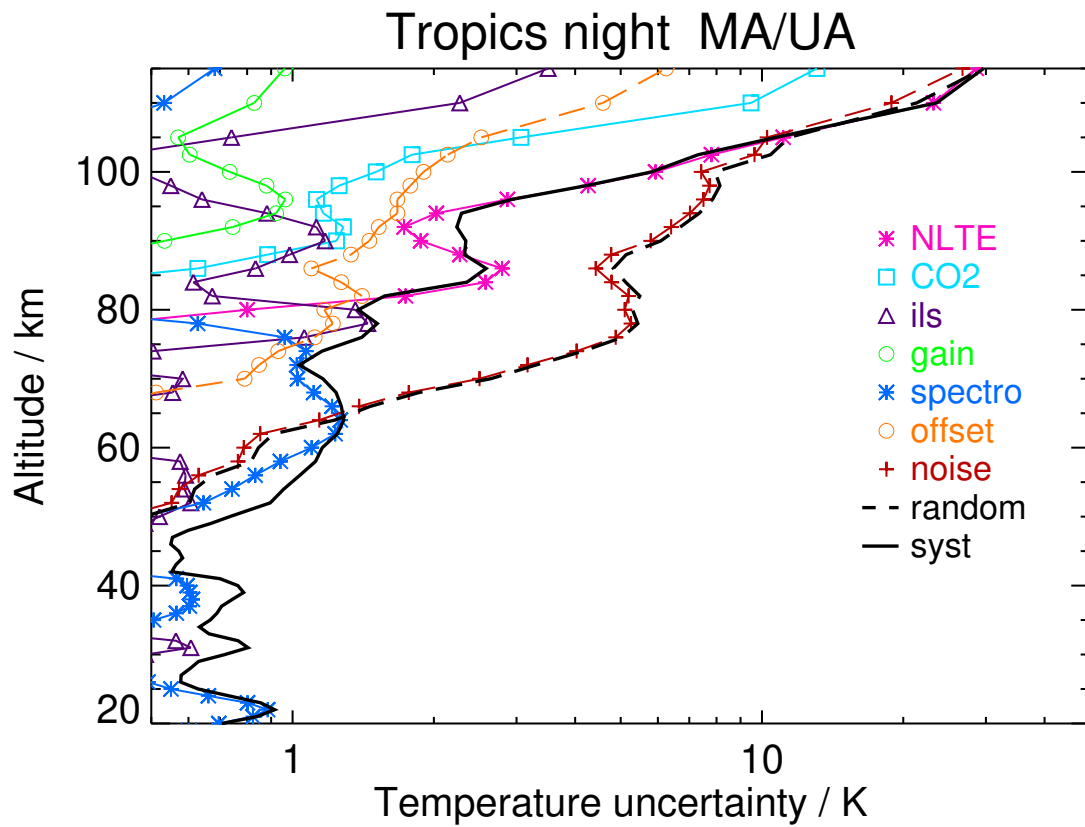

**Figure S18.** Temperature uncertainties for Tropics nighttime conditions.

**Table S19.** Temperature error budget for Southern midlatitude winter day. All uncertainties are  $1\sigma$ .

| altitude<br>(km) | mean target<br>(K) | NLTE<br>(K) | CO2<br>(K) | ils<br>(K) | gain<br>(K) | spectro<br>(K) | offset<br>(K) | noise<br>(K) | random<br>(K) | syst<br>(K) |
|------------------|--------------------|-------------|------------|------------|-------------|----------------|---------------|--------------|---------------|-------------|
| 20               | 216.7              | <0.1        | <0.1       | 0.1        | 0.4         | 0.2            | <0.1          | 0.3          | 0.3           | 0.4         |
| 30               | 220.2              | <0.1        | <0.1       | 0.4        | 0.4         | 0.6            | <0.1          | 0.3          | 0.5           | 0.6         |
| 40               | 242.3              | <0.1        | <0.1       | 0.3        | 0.4         | 0.6            | <0.1          | 0.3          | 0.6           | 0.7         |
| 50               | 257.2              | <0.1        | <0.1       | 0.5        | 0.3         | 0.6            | 0.1           | 0.5          | 0.7           | 0.8         |
| 60               | 238.2              | <0.1        | <0.1       | 0.4        | 0.3         | 1.0            | 0.2           | 0.9          | 1.0           | 1.0         |
| 70               | 211.9              | 0.2         | 0.2        | 0.4        | 0.2         | 1.0            | 0.7           | 2.5          | 2.6           | 1.0         |
| 80               | 203.4              | 0.9         | <0.1       | 0.5        | 0.2         | 0.5            | 1.4           | 5.0          | 5.2           | 0.9         |
| 90               | 191.5              | 1.3         | 1.3        | 1.1        | 0.5         | 0.2            | 1.3           | 5.6          | 5.9           | 1.9         |
| 100              | 183.5              | 7.1         | 1.9        | 0.7        | 0.9         | 0.5            | 2.3           | 8.4          | 9.2           | 6.8         |
| 110              | 267.3              | 21.5        | 10.6       | 2.1        | 0.7         | 0.5            | 6.5           | 23.7         | 26.3          | 22.1        |
| 115              | 323.7              | 24.8        | 13.0       | 2.8        | 0.7         | 0.6            | 7.9           | 29.1         | 32.1          | 25.9        |

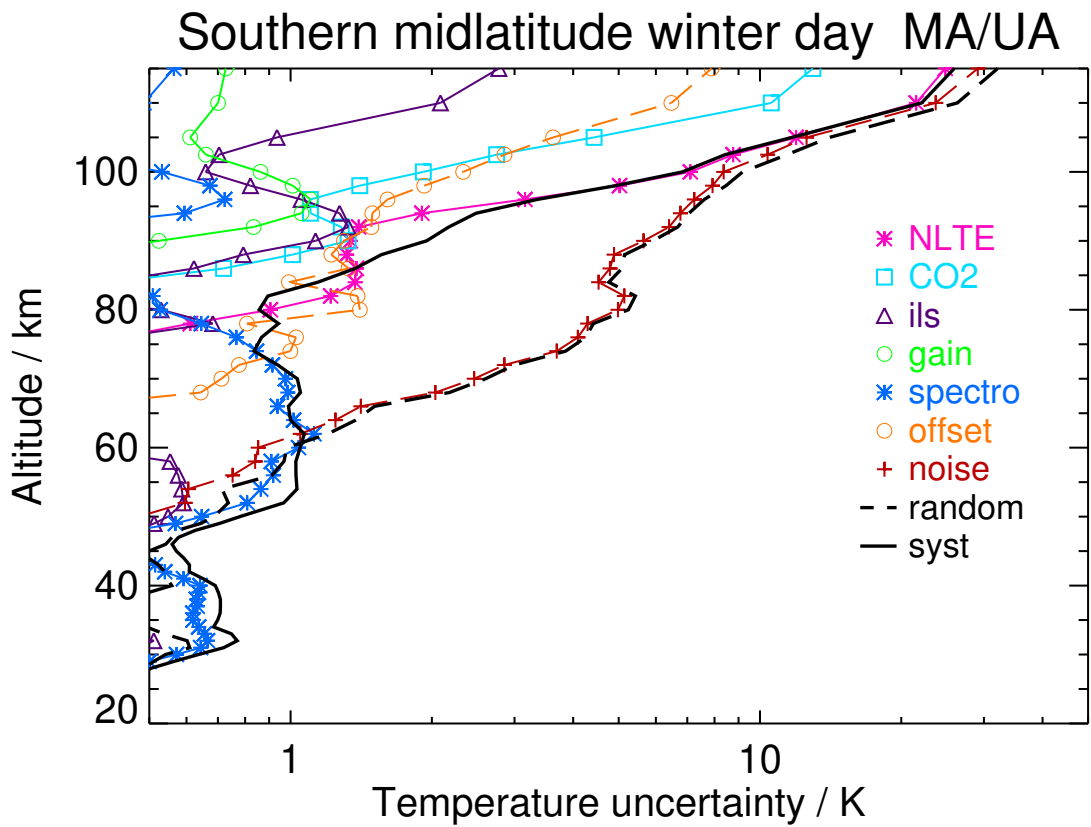

**Figure S19.** Temperature uncertainties for Southern midlatitude winter daytime conditions.

**Table S20.** Temperature error budget for Southern midlatitude winter night. All uncertainties are  $1\sigma$ .

| altitude<br>(km) | mean target<br>(K) | NLTE<br>(K) | CO2<br>(K) | ils<br>(K) | gain<br>(K) | spectro<br>(K) | offset<br>(K) | noise<br>(K) | random<br>(K) | syst<br>(K) |
|------------------|--------------------|-------------|------------|------------|-------------|----------------|---------------|--------------|---------------|-------------|
| 20               | 211.9              | <0.1        | <0.1       | 0.2        | 0.4         | 0.3            | <0.1          | 0.3          | 0.4           | 0.5         |
| 30               | 213.0              | <0.1        | <0.1       | 0.4        | 0.4         | 0.5            | <0.1          | 0.3          | 0.5           | 0.6         |
| 40               | 239.7              | <0.1        | <0.1       | 0.2        | 0.5         | 0.8            | <0.1          | 0.3          | 0.6           | 0.8         |
| 50               | 261.1              | <0.1        | <0.1       | 0.6        | 0.4         | 0.6            | 0.1           | 0.5          | 0.7           | 0.7         |
| 60               | 244.0              | 0.1         | <0.1       | 0.4        | 0.3         | 1.0            | 0.2           | 0.8          | 0.9           | 1.1         |
| 70               | 216.8              | 0.3         | 0.2        | 0.4        | 0.2         | 0.9            | 0.7           | 2.4          | 2.6           | 1.0         |
| 80               | 200.8              | 1.0         | <0.1       | 0.4        | 0.2         | 0.6            | 1.3           | 5.0          | 5.2           | 0.9         |
| 90               | 188.3              | 1.8         | 1.2        | 1.3        | 0.6         | 0.2            | 1.4           | 5.8          | 6.1           | 2.4         |
| 100              | 189.6              | 8.6         | 2.1        | 0.9        | 1.0         | 0.6            | 2.3           | 8.4          | 9.2           | 8.5         |
| 110              | 270.3              | 24.4        | 11.8       | 2.4        | 0.9         | 0.6            | 6.2           | 23.4         | 26.4          | 25.1        |
| 115              | 324.4              | 27.8        | 14.7       | 3.2        | 0.9         | 0.7            | 7.8           | 29.1         | 32.6          | 29.1        |

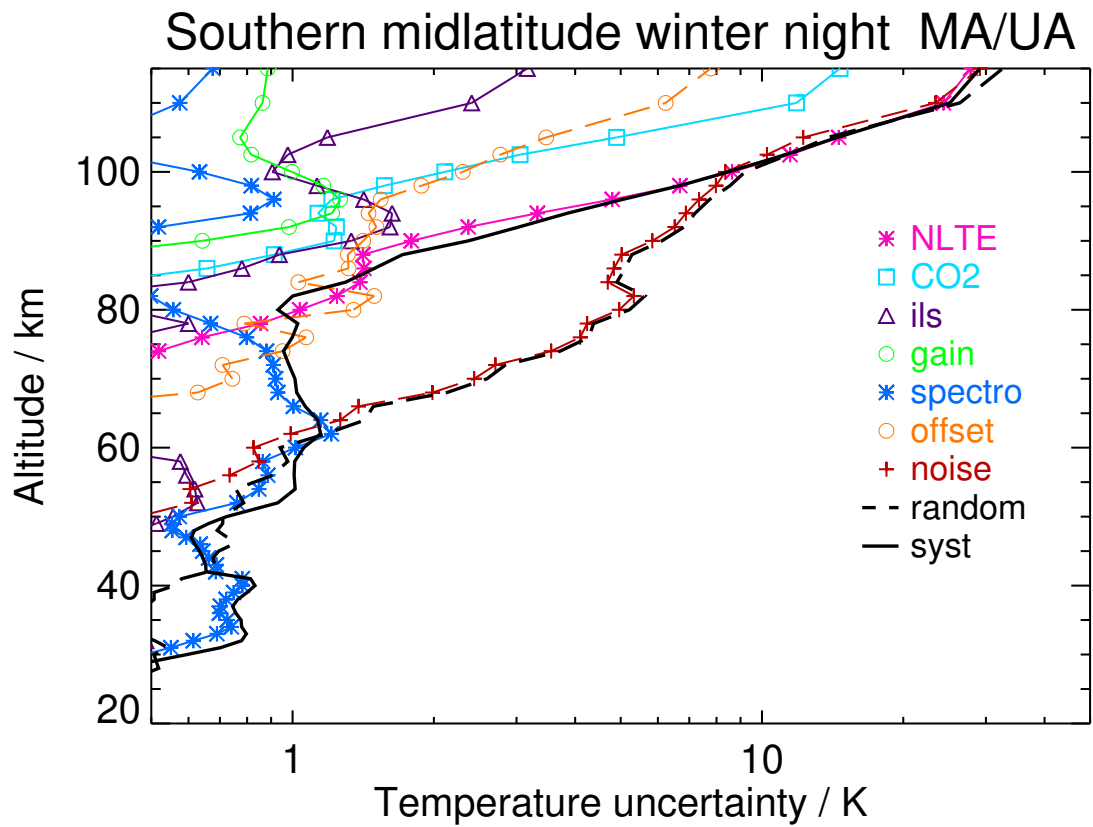

**Figure S20.** Temperature uncertainties for Southern midlatitude winter nighttime conditions.

**Table S21.** Temperature error budget for Southern midlatitude spring day. All uncertainties are  $1\sigma$ .

| altitude<br>(km) | mean target<br>(K) | NLTE<br>(K) | CO2<br>(K) | ils<br>(K) | gain<br>(K) | spectro<br>(K) | offset<br>(K) | noise<br>(K) | random<br>(K) | syst<br>(K) |
|------------------|--------------------|-------------|------------|------------|-------------|----------------|---------------|--------------|---------------|-------------|
| 20               | 223.1              | <0.1        | <0.1       | 0.1        | 0.4         | 0.2            | <0.1          | 0.2          | 0.4           | 0.4         |
| 30               | 229.7              | <0.1        | <0.1       | 0.4        | 0.4         | 0.3            | <0.1          | 0.3          | 0.4           | 0.6         |
| 40               | 246.1              | <0.1        | <0.1       | 0.3        | 0.4         | 0.5            | <0.1          | 0.3          | 0.4           | 0.7         |
| 50               | 261.4              | <0.1        | <0.1       | 0.5        | 0.3         | 0.4            | 0.1           | 0.4          | 0.5           | 0.7         |
| 60               | 243.3              | <0.1        | <0.1       | 0.3        | 0.2         | 1.1            | 0.2           | 0.8          | 0.8           | 1.1         |
| 70               | 212.7              | 0.1         | 0.2        | 0.5        | 0.2         | 0.9            | 0.7           | 2.3          | 2.4           | 1.0         |
| 80               | 193.9              | 0.6         | 0.1        | 0.4        | 0.2         | 0.6            | 1.4           | 5.0          | 5.2           | 0.7         |
| 90               | 183.9              | 1.3         | 1.4        | 0.9        | 0.4         | 0.2            | 1.4           | 5.7          | 6.0           | 1.7         |
| 100              | 188.4              | 8.5         | 2.2        | 0.6        | 1.0         | 0.6            | 2.2           | 8.4          | 9.3           | 8.3         |
| 110              | 271.4              | 27.0        | 10.0       | 3.3        | 1.1         | 0.7            | 5.7           | 21.5         | 23.7          | 27.8        |
| 115              | 341.9              | 32.7        | 13.4       | 4.7        | 1.2         | 0.9            | 7.5           | 28.3         | 30.8          | 34.3        |

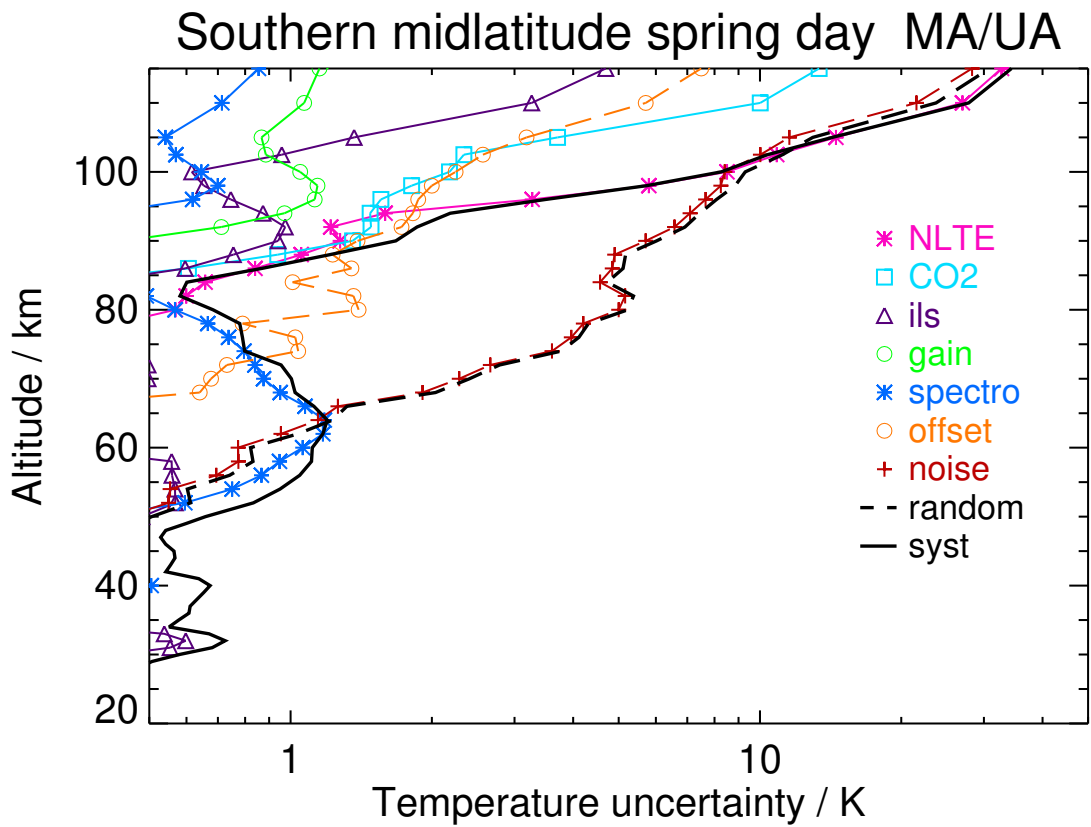

**Figure S21.** Temperature uncertainties for Southern midlatitude spring daytime conditions.



**Table S22.** Temperature error budget for Southern midlatitude spring night. All uncertainties are  $1\sigma$ .

| altitude<br>(km) | mean target<br>(K) | NLTE<br>(K) | CO2<br>(K) | ils<br>(K) | gain<br>(K) | spectro<br>(K) | offset<br>(K) | noise<br>(K) | random<br>(K) | syst<br>(K) |
|------------------|--------------------|-------------|------------|------------|-------------|----------------|---------------|--------------|---------------|-------------|
| 20               | 222.8              | <0.1        | <0.1       | 0.2        | 0.4         | 0.1            | <0.1          | 0.3          | 0.4           | 0.4         |
| 30               | 229.9              | <0.1        | <0.1       | 0.5        | 0.4         | 0.4            | <0.1          | 0.3          | 0.4           | 0.7         |
| 40               | 247.2              | <0.1        | <0.1       | 0.3        | 0.5         | 0.6            | <0.1          | 0.3          | 0.4           | 0.7         |
| 50               | 262.4              | <0.1        | <0.1       | 0.5        | 0.3         | 0.4            | 0.1           | 0.4          | 0.5           | 0.7         |
| 60               | 243.1              | <0.1        | <0.1       | 0.3        | 0.2         | 1.1            | 0.2           | 0.8          | 0.8           | 1.1         |
| 70               | 215.2              | 0.2         | 0.2        | 0.5        | 0.2         | 0.9            | 0.8           | 2.3          | 2.5           | 1.0         |
| 80               | 192.2              | 0.5         | 0.1        | 0.5        | 0.2         | 0.6            | 1.3           | 5.0          | 5.2           | 0.8         |
| 90               | 185.4              | 1.5         | 1.2        | 1.6        | 0.6         | 0.2            | 1.5           | 5.9          | 6.1           | 2.4         |
| 100              | 192.8              | 8.8         | 1.8        | 0.5        | 1.0         | 0.7            | 2.0           | 8.0          | 8.7           | 8.6         |
| 110              | 262.8              | 25.4        | 9.6        | 2.0        | 0.8         | 0.5            | 4.8           | 20.0         | 21.7          | 26.3        |
| 115              | 311.7              | 30.6        | 13.1       | 3.2        | 0.9         | 0.7            | 6.5           | 27.7         | 29.7          | 32.3        |

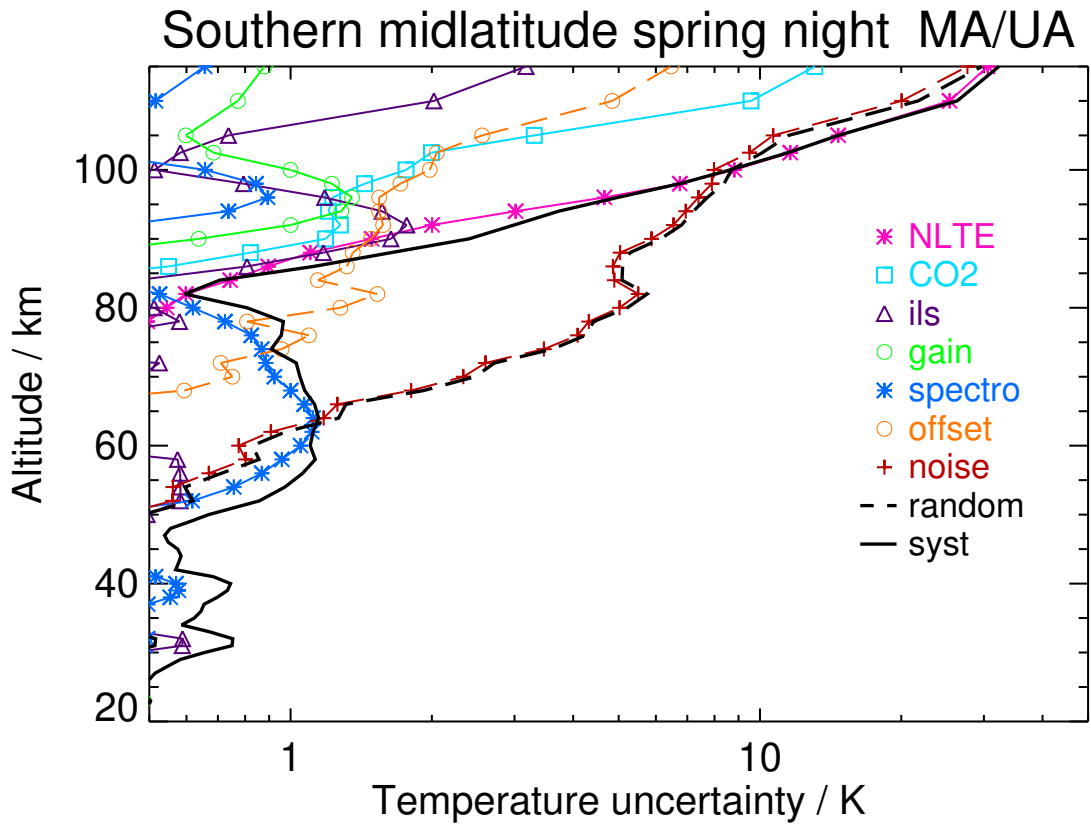

**Figure S22.** Temperature uncertainties for Southern midlatitude spring nighttime conditions.

**Table S23.** Temperature error budget for Southern midlatitude summer day. All uncertainties are  $1\sigma$ .

| altitude<br>(km) | mean target<br>(K) | NLTE<br>(K) | CO2<br>(K) | ils<br>(K) | gain<br>(K) | spectro<br>(K) | offset<br>(K) | noise<br>(K) | random<br>(K) | syst<br>(K) |
|------------------|--------------------|-------------|------------|------------|-------------|----------------|---------------|--------------|---------------|-------------|
| 20               | 218.1              | <0.1        | <0.1       | 0.2        | 0.3         | 0.2            | <0.1          | 0.3          | 0.4           | 0.4         |
| 30               | 233.3              | <0.1        | <0.1       | 0.6        | 0.3         | 0.4            | <0.1          | 0.3          | 0.3           | 0.7         |
| 40               | 256.4              | <0.1        | <0.1       | 0.2        | 0.4         | 0.4            | <0.1          | 0.3          | 0.4           | 0.7         |
| 50               | 267.4              | <0.1        | <0.1       | 0.5        | 0.3         | 0.4            | 0.1           | 0.4          | 0.5           | 0.6         |
| 60               | 246.3              | <0.1        | <0.1       | 0.3        | 0.2         | 1.1            | 0.2           | 0.8          | 0.8           | 1.2         |
| 70               | 209.9              | 0.2         | 0.1        | 0.6        | 0.1         | 0.9            | 0.8           | 2.2          | 2.4           | 1.1         |
| 80               | 175.3              | 0.9         | 0.2        | 0.5        | 0.2         | 0.5            | 1.3           | 5.1          | 5.3           | 0.9         |
| 90               | 181.1              | 1.1         | 1.4        | 1.1        | 0.5         | 0.2            | 1.6           | 5.8          | 6.1           | 1.8         |
| 100              | 200.0              | 11.3        | 3.5        | 0.5        | 0.8         | 0.4            | 2.0           | 8.0          | 9.1           | 11.3        |
| 110              | 305.7              | 37.3        | 20.3       | 4.2        | 1.3         | 0.8            | 5.7           | 21.7         | 25.3          | 41.0        |
| 115              | 356.3              | 43.2        | 25.4       | 5.8        | 1.4         | 0.9            | 7.8           | 28.5         | 32.4          | 48.7        |

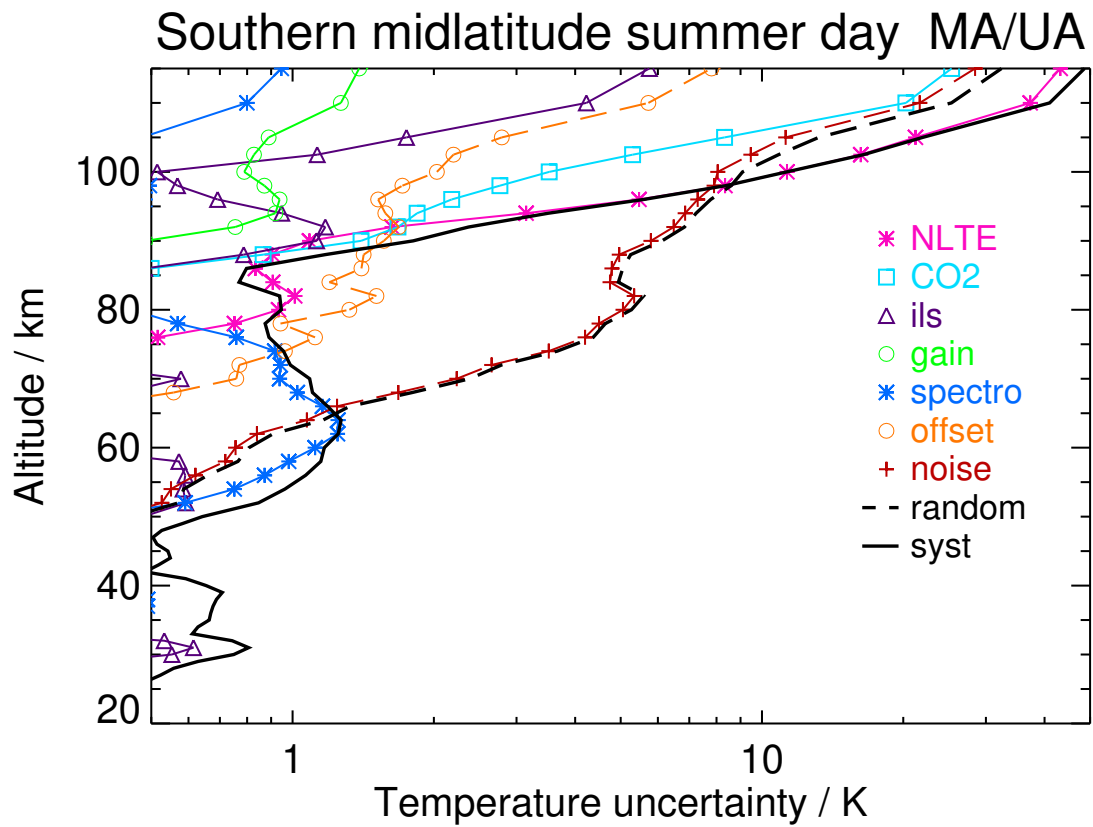

**Figure S23.** Temperature uncertainties for Southern midlatitude summer daytime conditions.

**Table S24.** Temperature error budget for Southern midlatitude summer night. All uncertainties are  $1\sigma$ .

| altitude<br>(km) | mean target<br>(K) | NLTE<br>(K) | CO2<br>(K) | ils<br>(K) | gain<br>(K) | spectro<br>(K) | offset<br>(K) | noise<br>(K) | random<br>(K) | syst<br>(K) |
|------------------|--------------------|-------------|------------|------------|-------------|----------------|---------------|--------------|---------------|-------------|
| 20               | 219.8              | <0.1        | <0.1       | 0.2        | 0.3         | 0.2            | <0.1          | 0.3          | 0.4           | 0.4         |
| 30               | 234.2              | <0.1        | <0.1       | 0.5        | 0.3         | 0.4            | <0.1          | 0.3          | 0.3           | 0.8         |
| 40               | 259.8              | <0.1        | <0.1       | 0.3        | 0.5         | 0.5            | <0.1          | 0.3          | 0.3           | 0.8         |
| 50               | 268.7              | <0.1        | <0.1       | 0.5        | 0.3         | 0.5            | 0.1           | 0.4          | 0.5           | 0.7         |
| 60               | 247.5              | <0.1        | <0.1       | 0.4        | 0.2         | 1.1            | 0.2           | 0.7          | 0.8           | 1.2         |
| 70               | 210.7              | <0.1        | 0.2        | 0.6        | 0.2         | 1.0            | 0.8           | 2.3          | 2.4           | 1.2         |
| 80               | 182.0              | 0.5         | 0.2        | 0.7        | 0.2         | 0.7            | 1.4           | 5.3          | 5.5           | 0.9         |
| 90               | 182.7              | 1.7         | 1.1        | 2.0        | 0.7         | 0.2            | 1.4           | 5.8          | 6.1           | 2.7         |
| 100              | 194.4              | 9.4         | 2.8        | 0.5        | 0.6         | 0.5            | 2.0           | 8.1          | 9.2           | 9.1         |
| 110              | 262.0              | 26.0        | 12.0       | 2.2        | 0.8         | 0.5            | 5.6           | 21.4         | 23.7          | 27.4        |
| 115              | 322.7              | 31.3        | 15.9       | 3.4        | 0.9         | 0.7            | 7.3           | 28.4         | 31.1          | 33.8        |

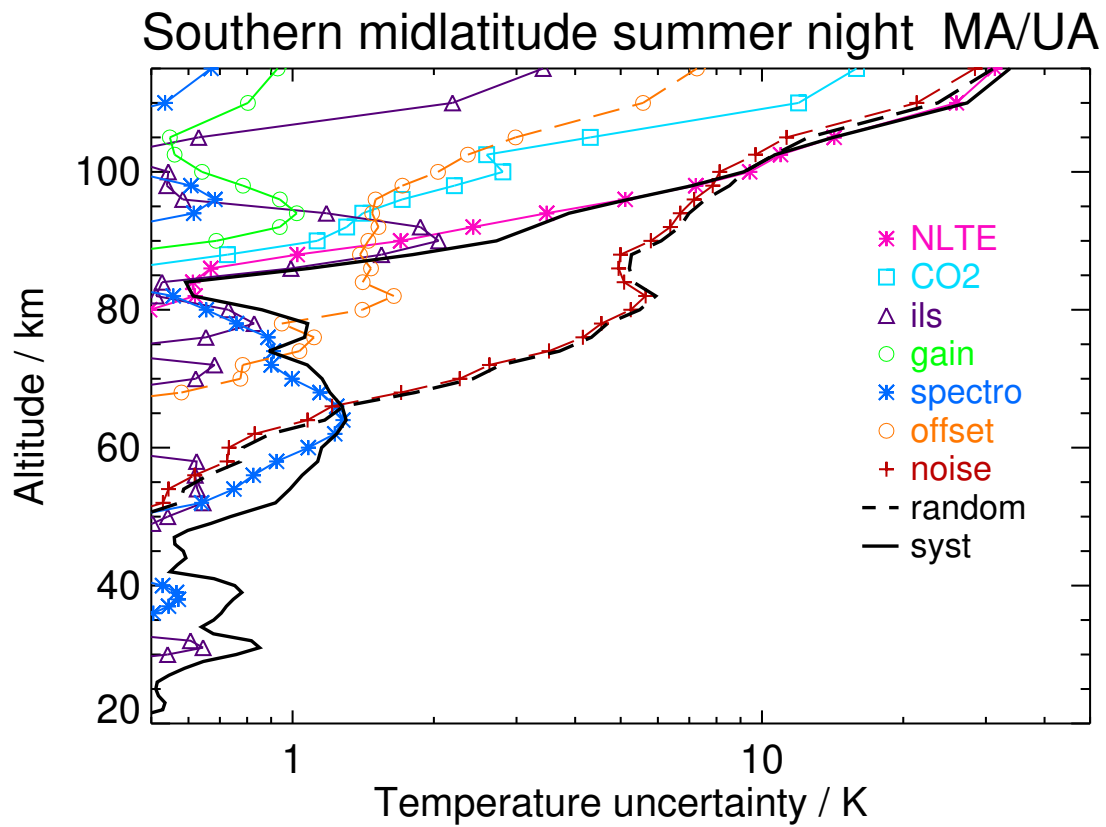

**Figure S24.** Temperature uncertainties for Southern midlatitude summer nighttime conditions.

**Table S25.** Temperature error budget for Southern midlatitude autumn day. All uncertainties are  $1\sigma$ .

| altitude<br>(km) | mean target<br>(K) | NLTE<br>(K) | CO2<br>(K) | ils<br>(K) | gain<br>(K) | spectro<br>(K) | offset<br>(K) | noise<br>(K) | random<br>(K) | syst<br>(K) |
|------------------|--------------------|-------------|------------|------------|-------------|----------------|---------------|--------------|---------------|-------------|
| 20               | 214.4              | <0.1        | <0.1       | 0.2        | 0.4         | 0.2            | <0.1          | 0.3          | 0.3           | 0.4         |
| 30               | 223.8              | <0.1        | <0.1       | 0.4        | 0.4         | 0.3            | <0.1          | 0.3          | 0.3           | 0.6         |
| 40               | 242.4              | <0.1        | <0.1       | 0.3        | 0.4         | 0.4            | <0.1          | 0.3          | 0.4           | 0.6         |
| 50               | 251.3              | <0.1        | <0.1       | 0.5        | 0.3         | 0.5            | 0.1           | 0.5          | 0.6           | 0.7         |
| 60               | 232.3              | <0.1        | <0.1       | 0.4        | 0.3         | 0.9            | 0.2           | 0.9          | 1.0           | 1.0         |
| 70               | 221.5              | 0.3         | 0.3        | 0.4        | 0.2         | 0.9            | 0.7           | 2.2          | 2.4           | 1.0         |
| 80               | 193.2              | 0.7         | <0.1       | 0.5        | 0.2         | 0.7            | 1.4           | 5.1          | 5.3           | 0.9         |
| 90               | 187.8              | 1.1         | 1.3        | 1.0        | 0.4         | 0.2            | 1.3           | 5.7          | 6.0           | 1.7         |
| 100              | 194.9              | 8.4         | 1.5        | 0.6        | 0.9         | 0.6            | 1.9           | 8.1          | 8.8           | 8.1         |
| 110              | 258.6              | 25.6        | 7.6        | 2.1        | 0.9         | 0.5            | 5.3           | 20.8         | 23.2          | 25.3        |
| 115              | 315.8              | 30.9        | 10.4       | 3.0        | 0.9         | 0.6            | 7.0           | 28.0         | 30.8          | 30.9        |

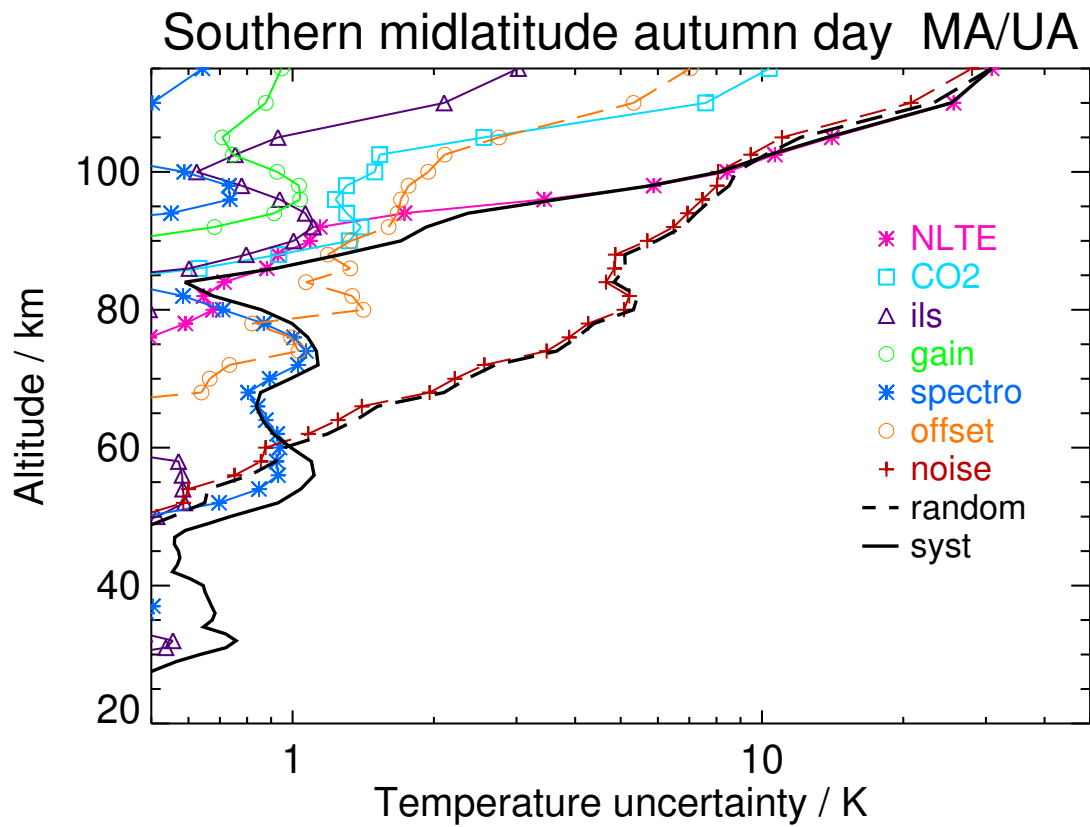

**Figure S25.** Temperature uncertainties for Southern midlatitude autumn daytime conditions.

**Table S26.** Temperature error budget for Southern midlatitude autumn night. All uncertainties are  $1\sigma$ .

| altitude<br>(km) | mean target<br>(K) | NLTE<br>(K) | CO2<br>(K) | ils<br>(K) | gain<br>(K) | spectro<br>(K) | offset<br>(K) | noise<br>(K) | random<br>(K) | syst<br>(K) |
|------------------|--------------------|-------------|------------|------------|-------------|----------------|---------------|--------------|---------------|-------------|
| 20               | 215.2              | <0.1        | <0.1       | 0.1        | 0.3         | 0.2            | <0.1          | 0.3          | 0.4           | 0.4         |
| 30               | 222.8              | <0.1        | <0.1       | 0.4        | 0.4         | 0.3            | <0.1          | 0.3          | 0.3           | 0.6         |
| 40               | 243.3              | <0.1        | <0.1       | 0.3        | 0.4         | 0.5            | <0.1          | 0.3          | 0.4           | 0.7         |
| 50               | 253.4              | <0.1        | <0.1       | 0.5        | 0.3         | 0.5            | 0.1           | 0.5          | 0.5           | 0.8         |
| 60               | 232.7              | <0.1        | <0.1       | 0.4        | 0.3         | 0.9            | 0.2           | 0.9          | 0.9           | 1.0         |
| 70               | 220.1              | 0.4         | 0.3        | 0.4        | 0.2         | 0.9            | 0.7           | 2.3          | 2.4           | 1.0         |
| 80               | 195.1              | 0.7         | 0.1        | 0.3        | 0.3         | 0.7            | 1.4           | 5.1          | 5.4           | 0.8         |
| 90               | 188.5              | 1.5         | 1.3        | 1.1        | 0.5         | 0.1            | 1.4           | 5.9          | 6.1           | 2.1         |
| 100              | 200.1              | 8.7         | 1.1        | 0.9        | 1.0         | 0.7            | 1.7           | 7.8          | 8.4           | 8.5         |
| 110              | 249.8              | 23.0        | 6.9        | 1.5        | 0.8         | 0.5            | 4.9           | 19.7         | 21.7          | 22.9        |
| 115              | 301.3              | 28.5        | 10.0       | 2.4        | 0.9         | 0.6            | 6.5           | 27.5         | 30.0          | 28.6        |

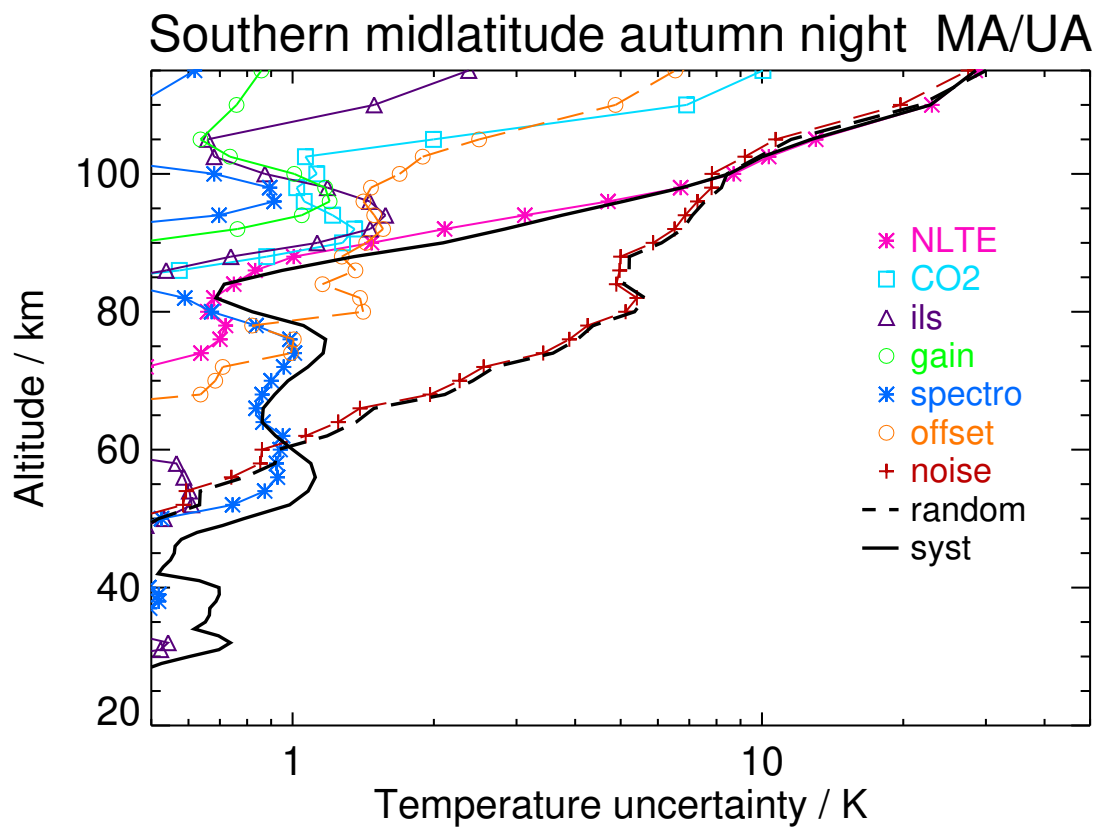

**Figure S26.** Temperature uncertainties for Southern midlatitude autumn nighttime conditions.

**Table S27.** Temperature error budget for Southern polar winter day. All uncertainties are  $1\sigma$ .

| altitude<br>(km) | mean target<br>(K) | NLTE<br>(K) | CO2<br>(K) | ils<br>(K) | gain<br>(K) | spectro<br>(K) | offset<br>(K) | noise<br>(K) | random<br>(K) | syst<br>(K) |
|------------------|--------------------|-------------|------------|------------|-------------|----------------|---------------|--------------|---------------|-------------|
| 20               | 193.4              | <0.1        | <0.1       | 0.3        | 0.2         | 0.2            | <0.1          | 0.3          | 0.4           | 0.4         |
| 30               | 214.6              | <0.1        | <0.1       | 0.3        | 0.3         | 1.1            | <0.1          | 0.3          | 0.5           | 1.1         |
| 40               | 258.4              | <0.1        | <0.1       | 0.3        | 0.5         | 0.8            | <0.1          | 0.3          | 0.6           | 0.8         |
| 50               | 274.0              | <0.1        | <0.1       | 0.6        | 0.4         | 0.6            | 0.1           | 0.5          | 0.7           | 0.7         |
| 60               | 252.4              | 0.2         | <0.1       | 0.4        | 0.3         | 1.1            | 0.2           | 0.9          | 1.0           | 1.1         |
| 70               | 216.5              | 0.2         | 0.2        | 0.4        | 0.2         | 0.9            | 0.6           | 2.3          | 2.4           | 1.0         |
| 80               | 202.9              | 0.8         | <0.1       | 0.6        | 0.2         | 0.5            | 1.5           | 5.0          | 5.3           | 0.8         |
| 90               | 192.3              | 1.4         | 1.4        | 1.4        | 0.6         | 0.1            | 1.4           | 5.9          | 6.1           | 2.3         |
| 100              | 191.1              | 7.4         | 1.7        | 0.8        | 0.8         | 0.4            | 2.2           | 8.5          | 9.1           | 7.2         |
| 110              | 267.8              | 21.6        | 10.1       | 2.2        | 0.8         | 0.5            | 6.6           | 23.7         | 25.8          | 22.6        |
| 115              | 331.0              | 24.9        | 12.5       | 2.9        | 0.9         | 0.6            | 8.1           | 29.0         | 31.5          | 26.4        |

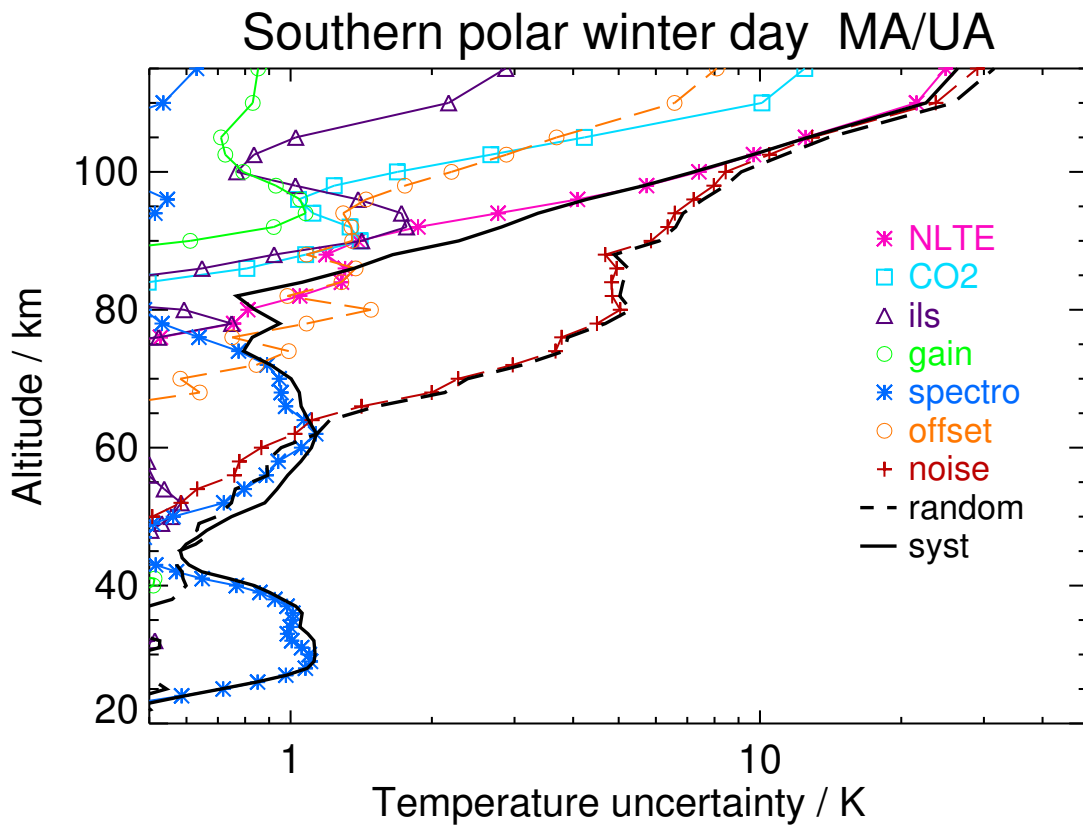

**Figure S27.** Temperature uncertainties for Southern polar winter daytime conditions.

**Table S28.** Temperature error budget for Southern polar winter night. All uncertainties are  $1\sigma$ .

| altitude<br>(km) | mean target<br>(K) | NLTE<br>(K) | CO2<br>(K) | ils<br>(K) | gain<br>(K) | spectro<br>(K) | offset<br>(K) | noise<br>(K) | random<br>(K) | syst<br>(K) |
|------------------|--------------------|-------------|------------|------------|-------------|----------------|---------------|--------------|---------------|-------------|
| 20               | 194.7              | <0.1        | <0.1       | 0.3        | 0.2         | 0.3            | <0.1          | 0.3          | 0.4           | 0.4         |
| 30               | 214.7              | <0.1        | <0.1       | 0.3        | 0.3         | 1.0            | <0.1          | 0.3          | 0.4           | 1.1         |
| 40               | 259.8              | <0.1        | <0.1       | 0.3        | 0.5         | 0.8            | <0.1          | 0.3          | 0.6           | 0.9         |
| 50               | 269.3              | <0.1        | <0.1       | 0.6        | 0.4         | 0.4            | 0.1           | 0.5          | 0.6           | 0.7         |
| 60               | 255.8              | 0.2         | <0.1       | 0.4        | 0.3         | 1.0            | 0.2           | 0.8          | 0.9           | 1.1         |
| 70               | 223.6              | 0.5         | 0.2        | 0.4        | 0.3         | 1.0            | 0.6           | 2.2          | 2.3           | 1.1         |
| 80               | 201.5              | 0.9         | <0.1       | 0.4        | 0.3         | 0.5            | 1.5           | 5.1          | 5.4           | 0.8         |
| 90               | 193.2              | 2.1         | 1.4        | 1.3        | 0.6         | 0.1            | 1.4           | 5.9          | 6.3           | 2.4         |
| 100              | 185.4              | 7.7         | 2.1        | 1.1        | 1.0         | 0.5            | 2.4           | 8.6          | 9.3           | 7.6         |
| 110              | 268.2              | 20.1        | 9.7        | 2.0        | 0.8         | 0.5            | 6.6           | 23.9         | 26.0          | 21.1        |
| 115              | 337.4              | 23.0        | 11.8       | 2.6        | 0.8         | 0.6            | 8.0           | 28.9         | 31.2          | 24.5        |

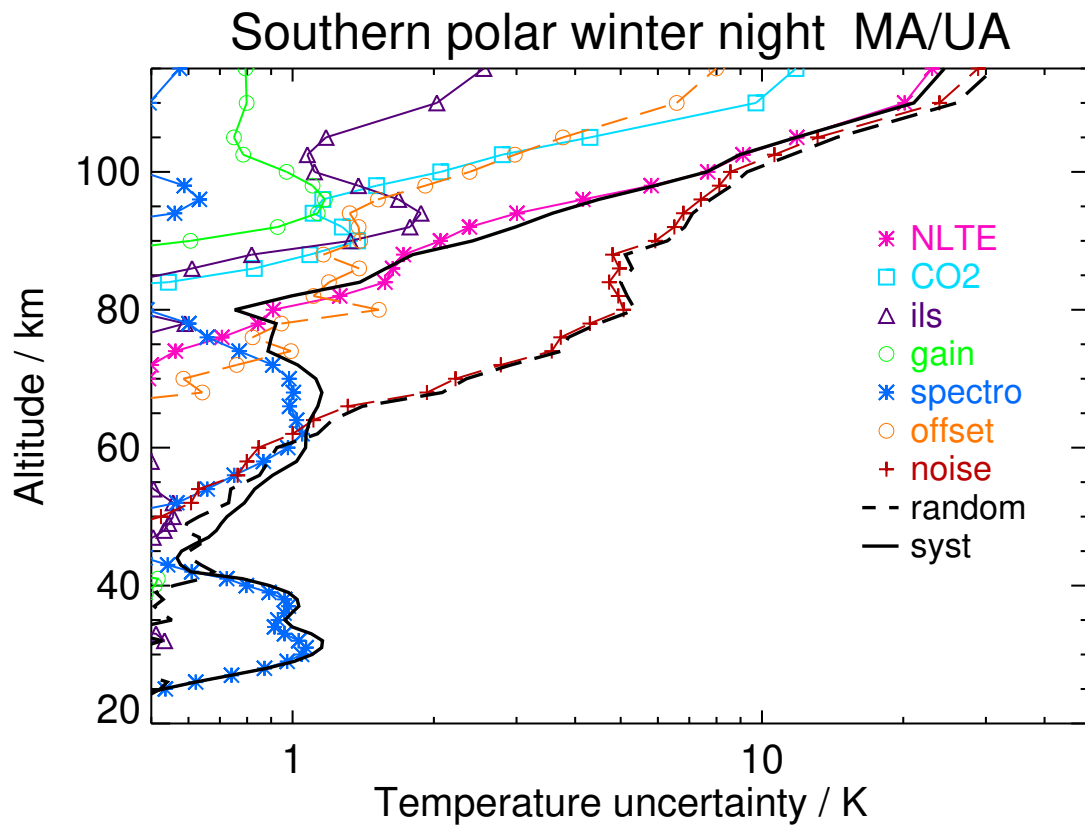

**Figure S28.** Temperature uncertainties for Southern polar winter nighttime conditions.

**Table S29.** Temperature error budget for Southern polar spring day. All uncertainties are  $1\sigma$ .

| altitude<br>(km) | mean target<br>(K) | NLTE<br>(K) | CO2<br>(K) | ils<br>(K) | gain<br>(K) | spectro<br>(K) | offset<br>(K) | noise<br>(K) | random<br>(K) | syst<br>(K) |
|------------------|--------------------|-------------|------------|------------|-------------|----------------|---------------|--------------|---------------|-------------|
| 20               | 212.0              | <0.1        | <0.1       | 0.2        | 0.2         | 1.1            | <0.1          | 0.3          | 0.6           | 1.0         |
| 30               | 253.8              | <0.1        | <0.1       | 0.4        | 0.4         | 0.7            | <0.1          | 0.3          | 0.6           | 0.7         |
| 40               | 266.5              | <0.1        | <0.1       | 0.3        | 0.5         | 0.2            | <0.1          | 0.3          | 0.4           | 0.6         |
| 50               | 272.2              | <0.1        | <0.1       | 0.5        | 0.3         | 0.4            | 0.1           | 0.4          | 0.5           | 0.7         |
| 60               | 251.7              | <0.1        | <0.1       | 0.3        | 0.2         | 1.1            | 0.2           | 0.8          | 0.8           | 1.1         |
| 70               | 215.3              | <0.1        | 0.1        | 0.5        | 0.2         | 1.0            | 0.5           | 2.0          | 2.1           | 1.1         |
| 80               | 183.6              | 0.7         | 0.2        | 0.4        | 0.2         | 0.5            | 1.5           | 5.2          | 5.5           | 0.8         |
| 90               | 179.7              | 1.0         | 1.3        | 1.1        | 0.5         | 0.1            | 1.6           | 6.0          | 6.3           | 1.7         |
| 100              | 186.1              | 9.0         | 2.8        | 0.5        | 0.9         | 0.6            | 2.3           | 8.7          | 9.4           | 9.1         |
| 110              | 289.0              | 32.9        | 14.7       | 4.4        | 1.3         | 0.8            | 6.1           | 22.2         | 24.9          | 35.1        |
| 115              | 355.2              | 38.6        | 18.5       | 6.0        | 1.4         | 1.0            | 8.0           | 28.8         | 31.6          | 42.0        |

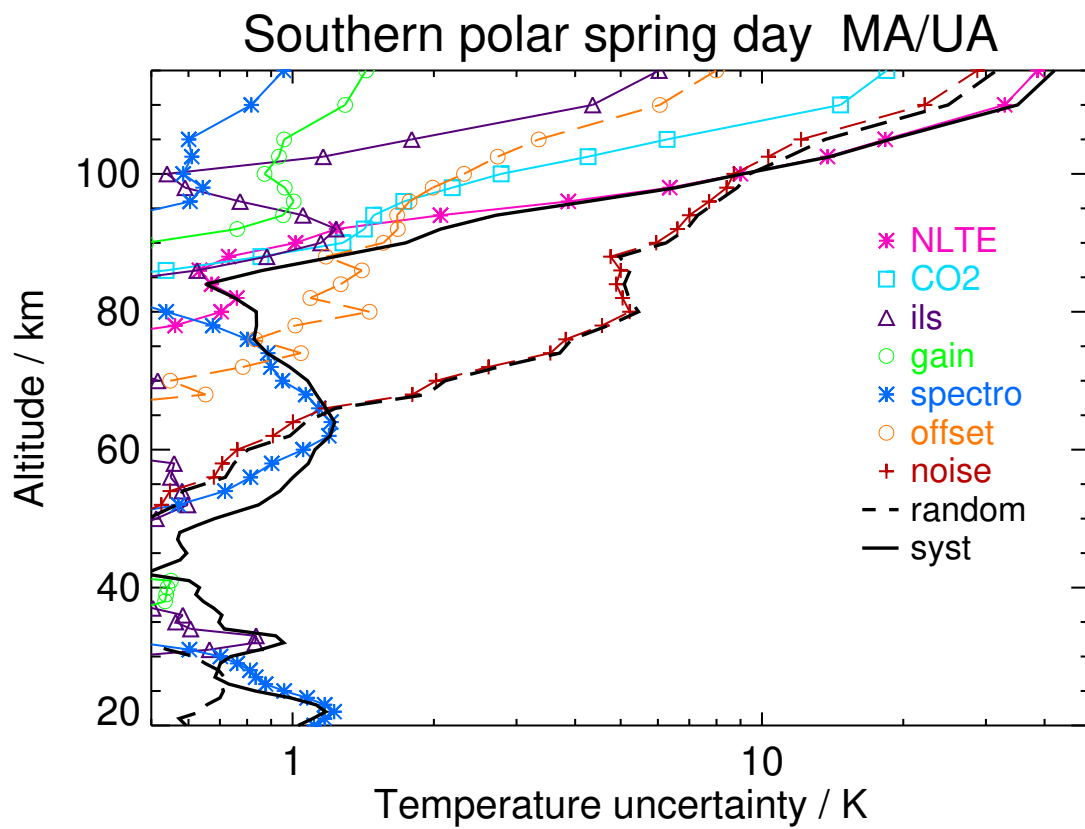**Figure S29.** Temperature uncertainties for Southern polar spring daytime conditions.



**Table S30.** Temperature error budget for Southern polar spring night. All uncertainties are  $1\sigma$ .

| altitude (km) | mean target (K) | NLTE (K) | CO2 (K) | ils (K) | gain (K) | spectro (K) | offset (K) | noise (K) | random (K) | syst (K) |
|---------------|-----------------|----------|---------|---------|----------|-------------|------------|-----------|------------|----------|
| 20            | 215.9           | <0.1     | <0.1    | <0.1    | 0.3      | 0.7         | <0.1       | 0.3       | 0.5        | 0.6      |
| 30            | 248.1           | <0.1     | <0.1    | 0.6     | 0.4      | 0.6         | <0.1       | 0.3       | 0.5        | 0.8      |
| 40            | 263.6           | <0.1     | <0.1    | 0.4     | 0.5      | 0.3         | <0.1       | 0.3       | 0.4        | 0.7      |
| 50            | 267.9           | <0.1     | <0.1    | 0.6     | 0.3      | 0.5         | 0.1        | 0.4       | 0.5        | 0.7      |
| 60            | 244.2           | <0.1     | <0.1    | 0.4     | 0.2      | 1.1         | 0.2        | 0.8       | 0.8        | 1.2      |
| 70            | 212.0           | 0.1      | 0.2     | 0.6     | 0.2      | 0.9         | 0.6        | 2.3       | 2.4        | 1.1      |
| 80            | 194.2           | 0.5      | 0.1     | 0.4     | 0.2      | 0.5         | 1.5        | 5.2       | 5.4        | 0.7      |
| 90            | 186.1           | 1.5      | 1.2     | 1.3     | 0.6      | 0.1         | 1.5        | 5.9       | 6.2        | 2.2      |
| 100           | 186.3           | 8.1      | 2.0     | 0.5     | 0.9      | 0.7         | 2.2        | 8.3       | 9.0        | 8.0      |
| 110           | 268.6           | 26.1     | 11.4    | 2.6     | 0.8      | 0.6         | 5.6        | 21.5      | 24.3       | 26.9     |
| 115           | 331.6           | 31.7     | 15.1    | 3.8     | 0.9      | 0.7         | 7.4        | 28.4      | 31.7       | 33.3     |

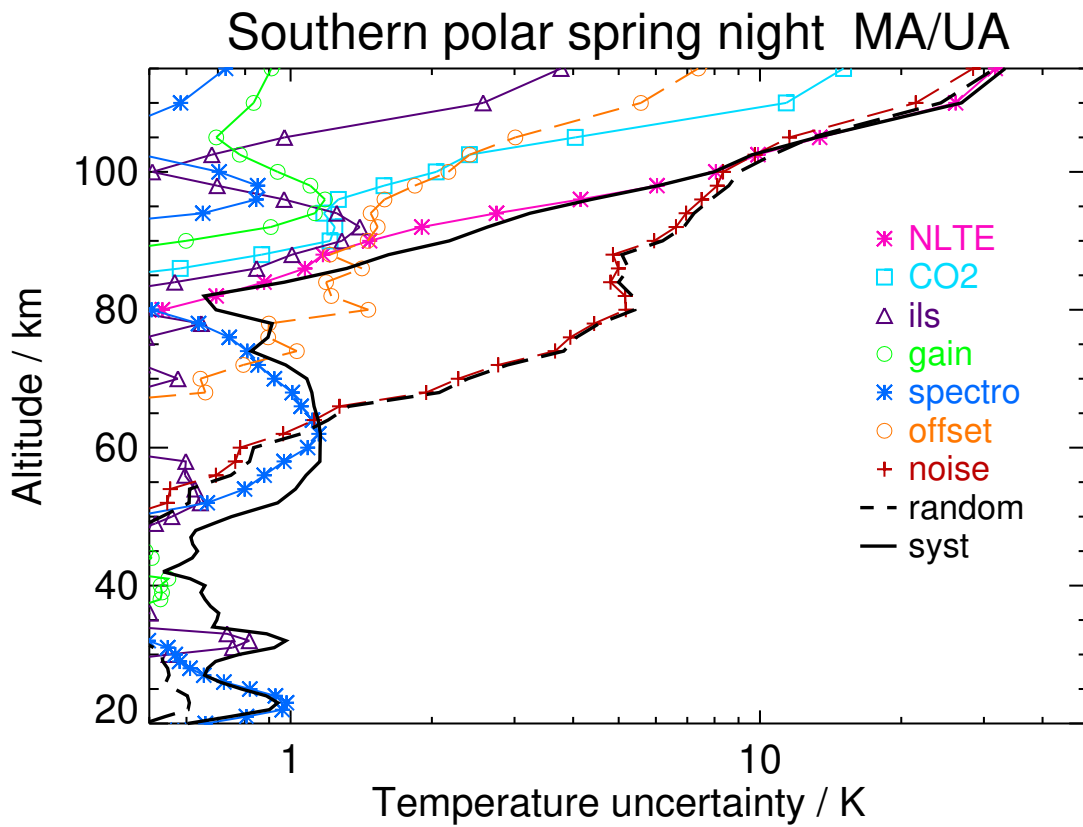

**Figure S30.** Temperature uncertainties for Southern polar spring nighttime conditions.

**Table S31.** Temperature error budget for Southern polar summer day. All uncertainties are  $1\sigma$ .

| altitude<br>(km) | mean target<br>(K) | NLTE<br>(K) | CO2<br>(K) | ils<br>(K) | gain<br>(K) | spectro<br>(K) | offset<br>(K) | noise<br>(K) | random<br>(K) | syst<br>(K) |
|------------------|--------------------|-------------|------------|------------|-------------|----------------|---------------|--------------|---------------|-------------|
| 20               | 233.2              | <0.1        | <0.1       | <0.1       | 0.4         | 0.1            | <0.1          | 0.3          | 0.3           | 0.4         |
| 30               | 241.2              | <0.1        | <0.1       | 0.6        | 0.3         | 0.3            | <0.1          | 0.3          | 0.3           | 0.7         |
| 40               | 264.9              | <0.1        | <0.1       | 0.3        | 0.5         | 0.4            | <0.1          | 0.2          | 0.3           | 0.7         |
| 50               | 282.6              | <0.1        | <0.1       | 0.5        | 0.2         | 0.2            | 0.1           | 0.4          | 0.5           | 0.6         |
| 60               | 265.6              | <0.1        | <0.1       | 0.4        | 0.2         | 1.0            | 0.2           | 0.7          | 0.7           | 1.1         |
| 70               | 225.2              | <0.1        | 0.2        | 0.3        | 0.2         | 1.2            | 0.5           | 1.7          | 1.8           | 1.3         |
| 80               | 167.2              | 1.1         | 0.5        | 0.9        | 0.3         | 0.6            | 1.5           | 5.4          | 5.6           | 1.5         |
| 90               | 143.3              | 1.1         | 1.2        | 0.7        | 0.4         | 0.2            | 2.1           | 5.9          | 6.4           | 1.5         |
| 100              | 216.2              | 15.8        | 8.0        | 1.2        | 1.0         | 0.6            | 2.2           | 8.5          | 9.9           | 17.2        |
| 110              | 326.3              | 41.7        | 31.5       | 5.9        | 1.6         | 1.0            | 6.2           | 22.2         | 25.8          | 51.3        |
| 115              | 369.6              | 46.9        | 37.5       | 7.8        | 1.8         | 1.1            | 8.4           | 28.7         | 32.4          | 59.3        |

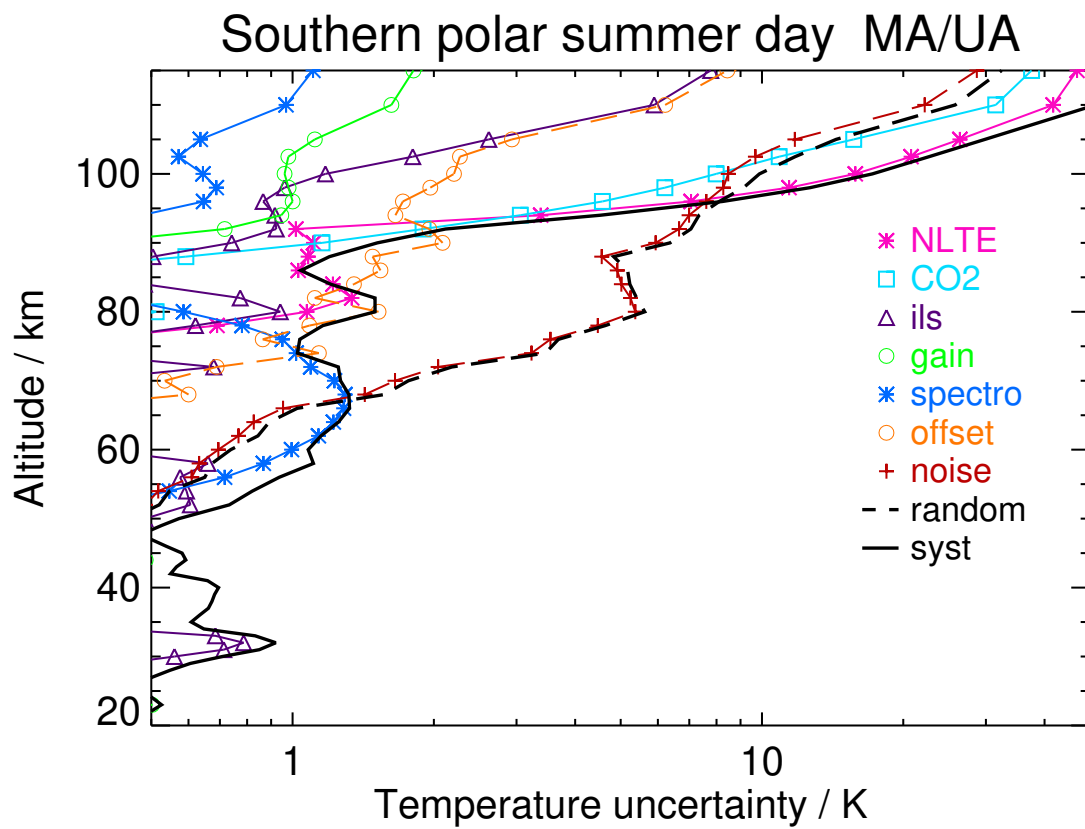**Figure S31.** Temperature uncertainties for Southern polar summer daytime conditions.

**Table S32.** Temperature error budget for Southern polar summer night. All uncertainties are  $1\sigma$ .

| altitude<br>(km) | mean target<br>(K) | NLTE<br>(K) | CO2<br>(K) | ils<br>(K) | gain<br>(K) | spectro<br>(K) | offset<br>(K) | noise<br>(K) | random<br>(K) | syst<br>(K) |
|------------------|--------------------|-------------|------------|------------|-------------|----------------|---------------|--------------|---------------|-------------|
| 20               | 226.7              | <0.1        | <0.1       | 0.1        | 0.4         | <0.1           | <0.1          | 0.3          | 0.3           | 0.4         |
| 30               | 233.2              | <0.1        | <0.1       | 0.5        | 0.4         | 0.3            | <0.1          | 0.3          | 0.3           | 0.7         |
| 40               | 254.8              | <0.1        | <0.1       | 0.3        | 0.5         | 0.5            | <0.1          | 0.3          | 0.3           | 0.7         |
| 50               | 268.0              | <0.1        | <0.1       | 0.5        | 0.3         | 0.4            | 0.1           | 0.4          | 0.5           | 0.7         |
| 60               | 249.3              | <0.1        | <0.1       | 0.3        | 0.2         | 1.1            | 0.2           | 0.7          | 0.8           | 1.1         |
| 70               | 214.5              | 0.1         | 0.1        | 0.6        | 0.2         | 1.1            | 0.6           | 2.0          | 2.1           | 1.2         |
| 80               | 174.8              | 0.6         | 0.2        | 0.5        | 0.2         | 0.6            | 1.5           | 5.5          | 5.8           | 0.8         |
| 90               | 177.9              | 1.2         | 1.1        | 1.8        | 0.7         | 0.3            | 1.6           | 6.1          | 6.3           | 2.4         |
| 100              | 204.2              | 12.1        | 2.9        | 0.5        | 0.8         | 0.5            | 2.0           | 8.3          | 9.0           | 12.1        |
| 110              | 286.0              | 33.5        | 15.1       | 3.0        | 1.0         | 0.7            | 5.7           | 21.3         | 25.4          | 34.7        |
| 115              | 340.5              | 39.1        | 19.2       | 4.3        | 1.1         | 0.8            | 7.7           | 28.4         | 32.7          | 41.4        |

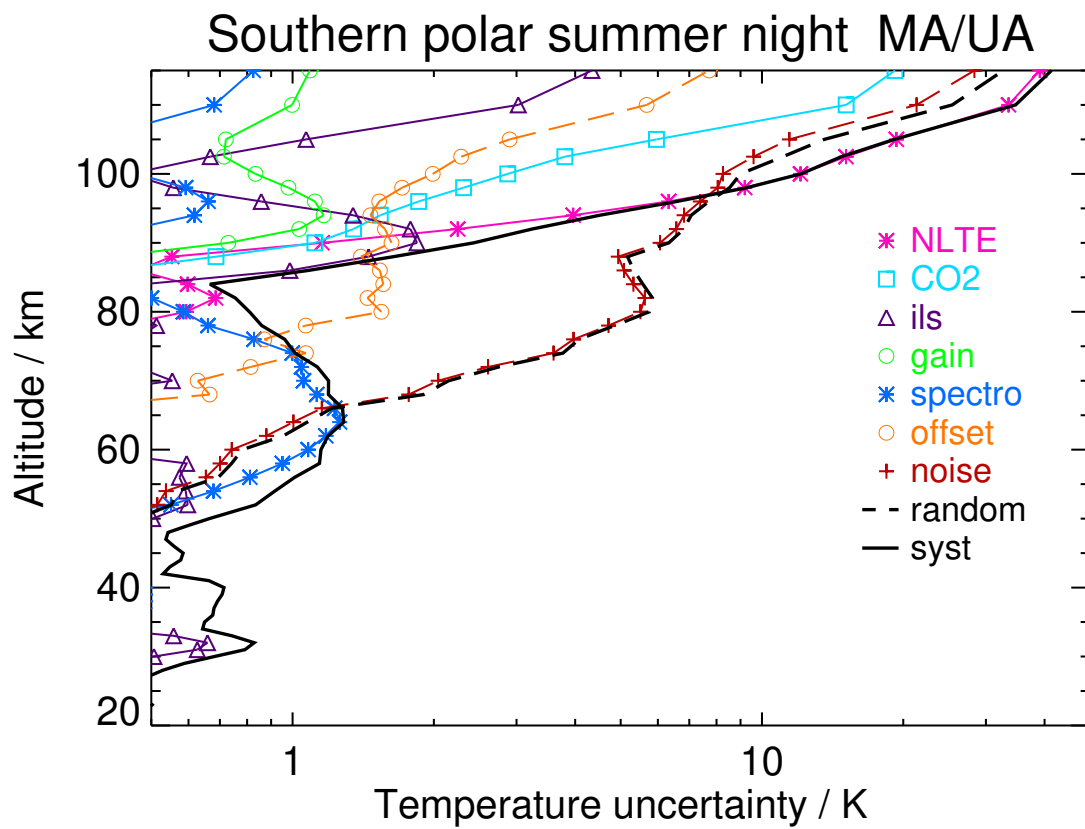

**Figure S32.** Temperature uncertainties for Southern polar summer nighttime conditions.

**Table S33.** Temperature error budget for Southern polar autumn day. All uncertainties are  $1\sigma$ .

| altitude<br>(km) | mean target<br>(K) | NLTE<br>(K) | CO2<br>(K) | ils<br>(K) | gain<br>(K) | spectro<br>(K) | offset<br>(K) | noise<br>(K) | random<br>(K) | syst<br>(K) |
|------------------|--------------------|-------------|------------|------------|-------------|----------------|---------------|--------------|---------------|-------------|
| 20               | 214.0              | <0.1        | <0.1       | 0.2        | 0.4         | 0.3            | <0.1          | 0.3          | 0.3           | 0.5         |
| 30               | 212.6              | <0.1        | <0.1       | 0.4        | 0.4         | 0.3            | <0.1          | 0.3          | 0.4           | 0.6         |
| 40               | 230.3              | <0.1        | <0.1       | 0.2        | 0.4         | 0.5            | <0.1          | 0.3          | 0.4           | 0.7         |
| 50               | 252.5              | <0.1        | <0.1       | 0.4        | 0.4         | 0.3            | 0.1           | 0.5          | 0.6           | 0.6         |
| 60               | 244.0              | 0.1         | <0.1       | 0.3        | 0.2         | 1.1            | 0.2           | 0.9          | 1.0           | 1.1         |
| 70               | 220.5              | 0.3         | 0.2        | 0.4        | 0.2         | 0.9            | 0.6           | 2.2          | 2.3           | 1.0         |
| 80               | 208.3              | 0.9         | <0.1       | 0.5        | 0.2         | 0.7            | 1.4           | 4.9          | 5.2           | 1.1         |
| 90               | 192.9              | 1.1         | 1.4        | 1.0        | 0.5         | 0.2            | 1.4           | 5.8          | 6.0           | 1.8         |
| 100              | 192.3              | 6.3         | 1.3        | 0.8        | 0.9         | 0.4            | 1.8           | 8.1          | 8.6           | 6.2         |
| 110              | 259.5              | 23.3        | 8.1        | 1.8        | 0.8         | 0.5            | 5.4           | 21.0         | 23.5          | 23.1        |
| 115              | 317.0              | 28.3        | 11.0       | 2.6        | 0.8         | 0.6            | 7.3           | 28.2         | 31.0          | 28.5        |

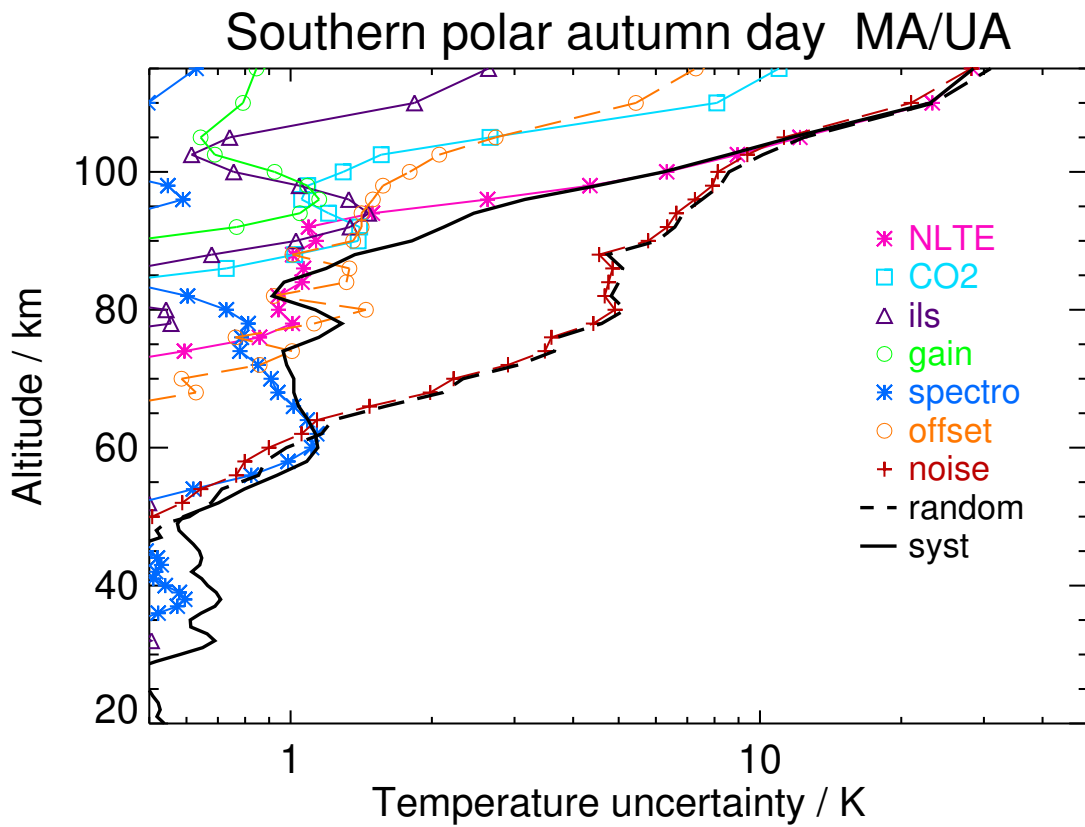

**Figure S33.** Temperature uncertainties for Southern polar autumn daytime conditions.

**Table S34.** Temperature error budget for Southern polar autumn night. All uncertainties are  $1\sigma$ .

| altitude<br>(km) | mean target<br>(K) | NLTE<br>(K) | CO2<br>(K) | ils<br>(K) | gain<br>(K) | spectro<br>(K) | offset<br>(K) | noise<br>(K) | random<br>(K) | syst<br>(K) |
|------------------|--------------------|-------------|------------|------------|-------------|----------------|---------------|--------------|---------------|-------------|
| 20               | 211.2              | <0.1        | <0.1       | 0.2        | 0.4         | 0.4            | <0.1          | 0.3          | 0.3           | 0.6         |
| 30               | 211.0              | <0.1        | <0.1       | 0.4        | 0.4         | 0.2            | <0.1          | 0.3          | 0.4           | 0.6         |
| 40               | 229.9              | <0.1        | <0.1       | 0.2        | 0.4         | 0.5            | <0.1          | 0.3          | 0.4           | 0.7         |
| 50               | 253.4              | <0.1        | <0.1       | 0.5        | 0.4         | 0.3            | 0.1           | 0.5          | 0.6           | 0.6         |
| 60               | 248.3              | 0.2         | <0.1       | 0.3        | 0.2         | 1.0            | 0.2           | 0.9          | 0.9           | 1.1         |
| 70               | 224.8              | 0.5         | 0.2        | 0.4        | 0.2         | 1.0            | 0.5           | 2.1          | 2.2           | 1.2         |
| 80               | 210.0              | 1.1         | <0.1       | 0.4        | 0.3         | 0.6            | 1.5           | 4.9          | 5.2           | 1.1         |
| 90               | 195.9              | 1.5         | 1.4        | 0.9        | 0.4         | 0.3            | 1.4           | 5.8          | 6.1           | 2.1         |
| 100              | 191.6              | 6.4         | 1.1        | 1.2        | 1.1         | 0.6            | 1.8           | 8.0          | 8.5           | 6.3         |
| 110              | 258.4              | 21.3        | 8.5        | 1.6        | 0.7         | 0.5            | 5.3           | 21.1         | 22.7          | 22.0        |
| 115              | 316.6              | 26.2        | 11.6       | 2.3        | 0.7         | 0.6            | 7.1           | 28.2         | 30.3          | 27.5        |

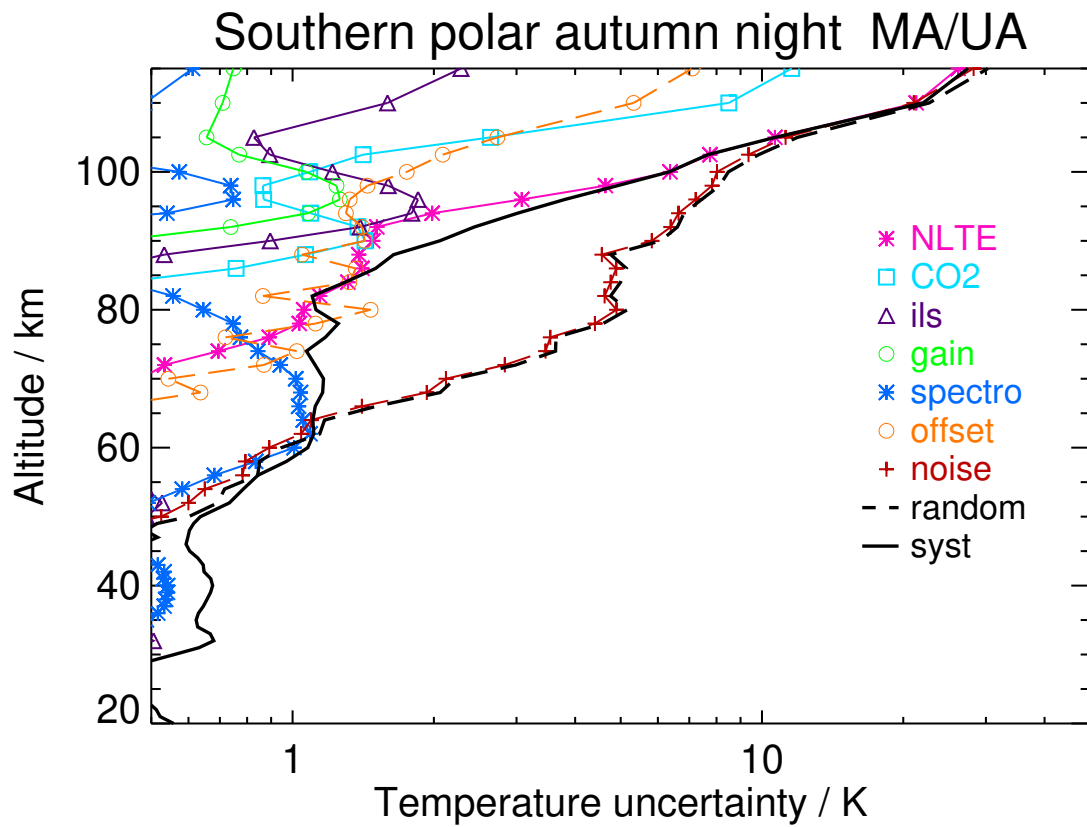

**Figure S34.** Temperature uncertainties for Southern polar autumn nighttime conditions.
